# Supplementary material for: Semistructured interviews regarding patients’ perceptions of Choosing Wisely and shared decision-making: an Australian study
Source: PubMed Central journal article supplement — BMJ Open. 2019 Aug 28;9(8):e031831. doi: 10.1136/bmjopen-2019-031831 (PMC6720255; doi:10.1136/bmjopen-2019-031831), 2019-08-28
Supplement: bmjopen-2019-031831.draft_revisions.pdf [file bmjopen-2019-031831.draft_revisions.pdf]

# BMJ Open

BMJ Open is committed to open peer review. As part of this commitment we make the peer review history of every article we publish publicly available.

When an article is published we post the peer reviewers' comments and the authors' responses online. We also post the versions of the paper that were used during peer review. These are the versions that the peer review comments apply to.

The versions of the paper that follow are the versions that were submitted during the peer review process. They are not the versions of record or the final published versions. They should not be cited or distributed as the published version of this manuscript.

BMJ Open is an open access journal and the full, final, typeset and author-corrected version of record of the manuscript is available on our site with no access controls, subscription charges or pay-per-view fees (<http://bmjopen.bmj.com>).

If you have any questions on BMJ Open's open peer review process please email [info.bmjopen@bmj.com](mailto:info.bmjopen@bmj.com)

# BMJ Open

## Semi-structured interviews regarding patients' perceptions of Choosing Wisely and shared decision-making: An Australian study

|                               |                                                                                                                                                                                                                                                                                                                                                                                                                                                                                 |
|-------------------------------|---------------------------------------------------------------------------------------------------------------------------------------------------------------------------------------------------------------------------------------------------------------------------------------------------------------------------------------------------------------------------------------------------------------------------------------------------------------------------------|
| Journal:                      | <i>BMJ Open</i>                                                                                                                                                                                                                                                                                                                                                                                                                                                                 |
| Manuscript ID                 | bmjopen-2019-031831                                                                                                                                                                                                                                                                                                                                                                                                                                                             |
| Article Type:                 | Research                                                                                                                                                                                                                                                                                                                                                                                                                                                                        |
| Date Submitted by the Author: | 22-May-2019                                                                                                                                                                                                                                                                                                                                                                                                                                                                     |
| Complete List of Authors:     | Allen, Jacqueline; Monash University, School of Nursing and Midwifery<br>King, Richard ; Monash Health<br>Goergen, Stacy; Monash University, Imaging; Monash Health, Radiology<br>Melder, Angela; Monash Univeristy, Monash Centre for Health Research and Implementation,<br>Neeman, Naama; Hudson Institute of Medical Research<br>Hadley, Annemarie; Monash Health<br>Hutchinson, Alison; Deakin University School of Nursing and Midwifery, School of Nursing and Midwifery |
| Keywords:                     | Quality in health care < HEALTH SERVICES ADMINISTRATION & MANAGEMENT, Organisation of health services < HEALTH SERVICES ADMINISTRATION & MANAGEMENT, QUALITATIVE RESEARCH, PUBLIC HEALTH                                                                                                                                                                                                                                                                                        |
|                               |                                                                                                                                                                                                                                                                                                                                                                                                                                                                                 |

SCHOLARONE™  
Manuscripts

## **Semi-structured interviews regarding patients' perceptions of Choosing Wisely and shared decision-making: An Australian study**

Short title: Choosing Wisely Patients' Perspectives

Word length: 3,994

Authors:

Jacqueline Allen (corresponding author), RN, PhD, BA (Hons), MPsyh  
Senior Lecturer  
Monash University, Clayton, Victoria, School of Nursing and Midwifery  
Wellington Rd, Clayton, 3800, Vic, Australia  
tel:+61 03 9905 5440  
[jacqui.allen@monash.edu](mailto:jacqui.allen@monash.edu)

Associate Professor Richard King, MBBS  
Monash Health  
246 Clayton Rd, Clayton, 3168, Vic, Australia  
[rwfk70@gmail.com](mailto:rwfk70@gmail.com)

Adjunct Clinical Professor Stacy Goergen, MBBS, MCLinEpi, FRANZCR  
Director of Research, Monash Imaging, Monash Health  
246 Clayton Rd, Clayton, 3168, Vic, Australia  
[Stacy.Goergen@monashhealth.org](mailto:Stacy.Goergen@monashhealth.org)

Angela Melder B App Sci (Applied Biology), MPH  
Manager Centre for Clinical Effectiveness, Monash Health  
246 Clayton Rd, Clayton, 3168, Vic, Australia  
[angela.melder@monash.edu](mailto:angela.melder@monash.edu)

Naama Neeman MPH  
Children's Cancer Foundation Administrative Director  
Hudson Institute of Medical Research  
[Naama.neeman@hudson.org.au](mailto:Naama.neeman@hudson.org.au)

Anne Marie Hadley MBBS, BHA  
Chief Experience Officer, Monash Health  
246 Clayton Rd, Clayton, 3168, Vic, Australia  
[Annemarie.Hadley@monashhealth.org](mailto:Annemarie.Hadley@monashhealth.org)

Professor Alison M Hutchinson, RN, PhD, BAppSci (Adv Nsg), MBioeth  
Chair in Nursing (Monash Health)  
Deakin University, Geelong, Victoria, School of Nursing and Midwifery; Centre for Quality and Patient Safety Monash Health Partnership, Monash Health  
221 Burwood Hwy, Burwood, 3125, Vic, Australia  
[alison.hutchinson@deakin.edu.au](mailto:alison.hutchinson@deakin.edu.au)

## Abstract

Objectives: To examine how patients perceive shared decision-making regarding computed tomography (CT) scan referral and use of the five Choosing Wisely questions with their general practitioner (GP).

Design: Qualitative exploratory using semi-structured interviews

Setting: A large metropolitan public healthcare organisation in urban Australia.

Participants: Following purposive sampling, 20 patients and 2 carers participated. Patient participants aged 18 years or over were eligible if they were attending the healthcare organisation for a CT scan and referred by their GP. Carers/family were eligible to participate when they were in the role of an unpaid carer and were aged 18 years or over. Participants were required to speak English sufficiently to provide informed consent. Participants with cognitive impairment were excluded.

Findings: Eighteen interviews were conducted with the patient only. Two interviews were conducted with the patient and the patient's carer. Fourteen participants were female. Five themes resulted from the thematic analysis: 1) Needing to know, 2) Questioning doctors is not necessary, 3) Discussing scans is not required, 4) Uncertainty about questioning, and 5) Valuing the Choosing Wisely questions. Participants reported that they presented to their GP with a health problem that they needed to understand and address. Participants accepted their GPs decision to prescribe a CT scan to identify the nature of their problem. They reported ambivalence about engaging in shared decision-making with their doctor, although, many participants reported valuing the Choosing Wisely questions.

Conclusions: Shared decision-making is an important principle underpinning Choosing Wisely. Practice implementation requires understanding patients' motivations to engage in shared decision-making with a focus on attitudes, beliefs, knowledge and emotions. Systems-level support and education for healthcare practitioners in effective communication is important. However, this needs to emphasise communication with patients who have varying degrees of motivation to engage in shared decision-making and Choosing Wisely.

## Article Summary

Strengths and limitations of this study:

- The study employed purposive sampling; therefore, the findings cannot be generalised
- The qualitative methods enabled a detailed examination of patients' attitudes and beliefs
- Factors supporting the implementation of shared decision-making in Choosing Wisely were identified
- The findings have application to similar care contexts elsewhere

Original protocol for the study: See Supplementary file 1

Funding statement: This work was supported by funding from Monash Health, Clayton Victoria, Australia.

Competing interests statement: No conflict of interest is reported by the authors.

Author contributions: JA and AH designed and conceptualised the study with all other authors, JA recruited participants and collected data, JA and AH analysed data, JA and AH drafted the manuscript with support from all authors.

### Acknowledgements

We are thankful for the support of all patients and carers who generously participated in the study. We acknowledge the support and time of staff at the medical imaging department at Casey Hospital including Nick Ardley, the reception staff and the nursing staff. We acknowledge the support by Monash Health and the Deakin University School of Nursing and Midwifery.

### Keywords

Choosing Wisely, shared decision-making, patients' perspectives, semi-structured interviews

## Introduction

Choosing Wisely is a de-implementation initiative aiming to reduce low value healthcare. Two main principles underpin Choosing Wisely: 1) the responsible stewardship of healthcare resources, and 2) the inclusion of patients in healthcare decisions<sup>1</sup>. Numerous studies have been conducted to assess the implementation of Choosing Wisely in relation to responsible stewardship<sup>2-5</sup>. There is mixed research in relation to shared decision-making. Previous studies have identified that decision support tools facilitate shared decision-making<sup>6 7</sup>. Other research has found that patients overestimate the benefits of medical interventions and underestimate the associated harms<sup>8</sup>. However, few studies have been conducted about shared decision-making from the patient perspective in a de-implementation context such as Choosing Wisely.

### Choosing Wisely

Initiated in 2012 by the American Board of Internal Medicine Foundation, the US-based Consumer Reports, and nine US-based medical specialty societies, the Choosing Wisely campaign aims to avoid healthcare services, including tests and treatments, associated with evidence of low efficacy and / or potential risk of harm to patients<sup>1 4</sup>. Over 20 countries including Canada, Italy, the UK and Australia, have joined the Choosing Wisely initiative. Choosing Wisely emphasises the responsibilities of medical professionals to justly distribute and manage healthcare resources<sup>1 9</sup>. Additionally, Choosing Wisely emphasises shared decision-making between healthcare practitioners and patients<sup>9</sup>.

To date, studies investigating the effectiveness of Choosing Wisely implementation have addressed responsible stewardship in terms of the development of lists of tests and treatments to avoid<sup>10 11</sup>, impact studies<sup>12 13</sup>, education interventions<sup>14</sup> and physician attitudes<sup>15 16</sup>. Previous studies have identified a range of patient attitudes regarding Choosing Wisely. A Canadian study identified that patients endorsed Choosing Wisely values and de-implementing low value care<sup>17</sup>. In an Australian evaluation, 61% of consumer participants indicated that they agreed with the Choosing Wisely campaign and the patient's role in reducing care of low value<sup>18</sup>. However, 61% of participants expected that their medical practitioner should order all medical tests if they were unwell<sup>18</sup>.

## Shared decision-making

Shared decision-making refers to the involvement of patients in making decisions about their health and healthcare with clinicians<sup>6 19</sup>. The Choosing Wisely movement promotes shared decision-making between patients and healthcare professionals in relation to de-implementation of low value care<sup>1 4</sup>. Shared decision-making is promoted through the five Choosing Wisely questions (listed in Box 1) recommended for patients to use in discussions with their healthcare practitioner<sup>18</sup>.

### Box 1 Five Choosing Wisely Questions

1. Do I really need this test or procedure?
2. What are the risks?
3. Are there simpler, safer options?
4. What happens if I don't do anything?
5. What are the costs?<sup>20</sup>

Previous research about shared decision-making has largely focussed on developing and testing decision support tools<sup>19</sup>. In their systematic review, Stacey et al.<sup>6</sup> found good effectiveness of decision support tools on promoting patients' knowledge, communication between patients and practitioners, and patient satisfaction. Another systematic review found that medical practitioners endorse the use of decision support tools<sup>21</sup>. Decision support tools have also been found to challenge practice because of lack of clinician time, lack of care continuity, lack of patient knowledge, and power imbalance between patients and clinicians<sup>7 22</sup>. The decision support tools investigated in these systematic reviews were based on high quality research evidence and addressed a range of focussed health conditions<sup>6 7 19 21</sup>.

Despite the substantial quantity of research in relation to decision support tools<sup>6</sup>, limited research is available about shared decision-making and Choosing Wisely from the patient perspective. Additionally, previous studies about shared decision-making have emphasised specified health problems<sup>19</sup>. Therefore, we explored patients' overall perspectives about shared decision-making with their general practitioner (GP) with regard to using the five Choosing Wisely questions. We included patients who had been referred by their GP for a computed tomography (CT) scan. This group was selected for inclusion because reductions in

1  
2  
3 CT scans for nominated conditions are one important target area of Choosing Wisely due to  
4 the risk of exposure to unnecessary radiation<sup>19</sup>.

## 5 6 7 **Research Question**

8  
9  
10 How do patients perceive shared decision-making about CT scan referral and use of the five  
11 Choosing Wisely questions with their GP?  
12

## 13 14 15 **Methodology**

16  
17  
18 The research design was qualitative exploratory using interviews. The SRQR guidelines were  
19 used to report the study methodology<sup>23</sup>.

## 20 21 22 **Patient Involvement in Research**

23  
24  
25 Patients were not involved in the development of the research question, study design,  
26 recruitment or conduct of the study. However, the research was designed to elicit patients'  
27 perceptions.  
28

## 29 30 31 **Conceptual Framework**

32  
33  
34 The Theoretical Domains Framework (TDF) formed the conceptual framework underpinning  
35 this study. The TDF was selected because it was developed and validated from a synthesis of  
36 the 33 theories of behaviour change best suited to implementation research and practice<sup>24-26</sup>.  
37 We adopted the most recently published version of the TDF, which comprises 14-domains.  
38 The domains focus on individual motivation for behaviour and change including knowledge,  
39 beliefs, memory and decision processes, social and environmental influences, and emotion<sup>26</sup>.  
40  
41  
42  
43  
44

## 45 46 47 **Setting**

48  
49  
50 The setting comprised a large metropolitan public healthcare network in south-eastern  
51 Australia. Following referral by their GP, patients attended the health network for an  
52 outpatient CT scan. The public healthcare network provides acute, sub-acute and outpatient  
53 services, including medical imaging, to a culturally and socio-economically diverse  
54 community. Selection of this setting was expected to maximise variation and opportunities  
55 for information about patients from different cultural and socio-economic backgrounds.  
56  
57  
58  
59  
60



## Participants

Purposive sampling using maximum variation for educational background and for socio-economic status was used to select, for a semi-structured interview, up to 20 patients plus or minus carers/family. All patients were aged 18 years or older. Similar codes and categories were identified during analysis of the first 14 interviews. An additional six interviews were conducted with no new codes and categories emerging. Therefore, data saturation was considered to be achieved after 20 interviews. Participants were attending the healthcare organisation for a CT scan having been referred by their GP. Where carers/family accompanied the patient, and with the patient's permission, the carer/family member was invited to participate in the interview. Carers/family were eligible to participate when they were in the role of an unpaid carer, as nominated by the patient. Participants were required to be at least 18 years of age and speak English sufficiently to provide informed consent. Where participants had a diagnosis of dementia or cognitive impairment recorded on the GP referral, they were not approached to participate.

## Data collection tools and guidelines

Data collection tools and guidelines comprised a demographic questionnaire and a semi-structured interview guide. These tools and guidelines were developed using the TDF and an earlier unpublished literature review as guides. The demographic questionnaire included questions about the participant's age, gender, country of birth, presenting health problem, educational background and employment. Interview guidelines comprised questions regarding the participant's perceptions of shared decision-making with their GP in relation to their CT scan, and their perceptions of the five Choosing Wisely patient questions.

## Procedure and data collection

Reception staff in the Imaging Department at the participating healthcare organisation identified participants who met the selection criteria. With the participant's permission, the researcher (JA) used the Participant Information and Consent Form (PICF) to introduce the study including the overall goal of improved understanding of patients' perceptions about shared decision-making in order to support patients' conversations with their doctors. Patients who agreed to participate were invited to nominate their informal carer to participate as well. Following an explanation of the study guided by the PICF, written consent from patients and carers was obtained. All participants were provided with a copy of the PICF. The researcher

1  
2  
3 then invited the patient, and if applicable their carer, to complete the demographic  
4 questionnaire to establish their eligibility to participate in the study. The researcher invited  
5 eligible patients and, if acceptable, their carer to participate in a face-to-face semi-structured  
6 interview in a private office at the Imaging Department after their scan, or to participate, at a  
7 later date, in a telephone interview of no more than 45 minutes duration. With permission, the  
8 semi-structured interview was audio-recorded for transcription. Interviews were conducted by  
9 the first author, a registered nurse with professional education in interviewing, at psychology  
10 Master's degree and nursing PhD level, and experience in interviewing patients and carers in  
11 both community health and research contexts. A professional transcriber transcribed the data.  
12  
13  
14  
15  
16  
17  
18  
19

## 20 Data analysis

21  
22 Demographic data were entered into Statistical Package for the Social Sciences version 21.  
23 Categorical information was analysed using frequencies. The inductive analysis technique of  
24 thematic analysis was used to analyse interview data<sup>27 28</sup>. Guided by the research aim and  
25 TDF, thematic analysis involved the comparing and contrasting of codes and categories  
26 within and between interviews to identify themes and sub-themes. The first author conducted  
27 the data analysis. The last author cross-coded interview transcripts. The first and last authors  
28 discussed codes, categories and themes to test the interpretation of the data and support a  
29 coherent interpretation of the interviews. All data relevant to the study are included in the  
30 article or uploaded as supplementary information.  
31  
32  
33  
34  
35  
36  
37  
38

## 39 Ethics Approvals

40  
41 In accordance with the Australian National Health and Medical Research Council guidelines,  
42 the Ethics Committees at the healthcare organisation and Deakin University provided ethics  
43 approvals. Patients and carers were voluntary participants in the study. Following an  
44 explanation of the study, guided by the PICF, participants provided verbal and written  
45 consent. All data were de-identified. Project identifier numbers were allocated to all  
46 qualitative information.  
47  
48  
49  
50  
51

## 52 Findings

53  
54 Twenty-two people agreed to participate. Eighteen interviews were conducted with the  
55 patient only. At two patients' requests, interviews were conducted with the patient and the  
56 patient's carer who had accompanied them to the medical imaging department. This resulted  
57  
58  
59  
60

1  
2  
3 in a total of 20 interviews. Most interviews (17) were conducted face-to-face at the healthcare  
4 organisation after the participant's scan. Three interviews were conducted by telephone one  
5 week after their scan. Six participants were aged less than 50 years, nine participants were  
6 aged 50-69 years, and seven participants were aged 70 to 89 years. Fourteen participants were  
7 female and sixteen spoke English at home. Participants experienced a range of health  
8 conditions including gastrointestinal problems, respiratory conditions, cardiovascular  
9 conditions, neuropathy, and back pain. Other demographic information is presented in  
10 Supplementary File 2. Five themes resulted from the thematic analysis:

- 11 1. Needing to know
- 12 2. Questioning doctors is not necessary
- 13 3. Discussing scans is not required
- 14 4. Uncertainty about questioning
- 15 5. Valuing the Choosing Wisely questions

### 26 Needing to know

27  
28 All participants noted that they required a CT scan because they needed to know what was  
29 wrong with them. According to one carer:

30  
31 'I don't think there was too much to decide. She [patient] complained about the pain and the  
32 doctor wanted to do this [CT scan] to see what's going on there. She just wants to feel a bit  
33 better. She would probably have any procedure.' (P2)

34  
35 The scan was important to most participants in order to plan and prepare for treatment to  
36 resolve their health problem. Three participants noted that the scan was important for their  
37 peace of mind so that they could prepare for pain in the future and rule 'sinister' things out.  
38 Two participants considered that the scan was important to help remove their pain. One  
39 participant wanted to be sure that their infection was gone. Another participant wanted to be  
40 properly diagnosed to stop people doubting that he had back problems. One patient  
41 commented:

42  
43 '...peace of mind is the right thing, but I think it's [the CT scan] just to know what's going on  
44 so I can prepare myself.' (P7)

## Questioning doctors is not necessary

Participants explained their perspectives about communicating with their doctor in the theme 'Questioning doctors is not necessary'. Many participants commented on their belief that their doctors made the right decision by requesting a CT scan for the quickest assessment of their illness. According to these participants, they did not have a discussion with their doctor or ask questions, as this was not perceived to be necessary.

'Our doctor, she's a doctor who doesn't want you to have unnecessary tests. We know that about her because she said that. So that when she recommends a test we tend to just think, yeah.' (Patient, P6)

According to several participants, their doctor explained radiation and reassured them about the risk, therefore there was no need to ask questions. According to other participants, because they had a relationship with their doctor, there was no need for discussion:

'I've been seeing her [the GP] for a while, I haven't had many CTs or x-rays done but I vaguely remember years ago her explaining radiation and not to be too stressed about it. This time 'No' because we've got an established relationship so she doesn't really need to rehash.' (Patient, P3)

Several participants commented that they trusted their doctor and their doctor's knowledge, and complied with their doctor's suggestions and decisions because they wished to feel better. Additionally, since they trusted their doctor's judgment and knowledge, they considered that asking questions about the decision to have a CT scan was not important or necessary. One patient commented:

'All through life you have to have x-rays. In the long run, it might cause some of your cancers. I don't know. But I don't think it would change me. You see people have got to keep believing in their GP. If you lose the trust. ... I wouldn't even go to a GP. That defeats the purpose.' (P20)

Most participants considered that people of older generations and also from some traditional family backgrounds and cultures might feel that it was disrespectful to ask their doctor any questions. Several participants commented that when a patient is in pain or very unwell they would not be well enough to ask questions.

1  
2  
3 Two participants noted that they needed to be their own advocate with their doctor and ensure  
4 that they were listened to. According to one participant, being her own advocate was  
5 important, as doctors could not know everything and could assume that patients wanted a  
6 quick answer to their problems:  
7  
8  
9

10  
11 'I think you've got to be your own advocate. ... You have to stand up and speak for yourself,  
12 and listen. ... Because sometimes they [the doctors] don't know better.' (Patient, P4)  
13  
14

### 15 Discussing scans is not required 16

17  
18 In the third theme 'Discussing scans is not required', participants explained their perspectives  
19 about deciding to have a CT scan. Most participants commented that they did not want more  
20 discussion with their doctor, because they knew what the scan was for, understood their CT  
21 scan and experienced no anxiety. Thirteen participants noted that as they had undergone at  
22 least one CT scan in the past, they were familiar with CT scans and understood what to  
23 expect. Nine participants reported that they were satisfied with the explanation about the  
24 purpose of the CT scan they received from their doctor.  
25  
26  
27  
28  
29

30  
31 'I understand most of what is going on a lot of the time anyway, so I don't really need to ask  
32 a lot of questions. I do ask when I need to but this wasn't a case that I needed to.' (Patient,  
33 P13)  
34  
35  
36

37  
38 Two participants did not want to ask any questions because they perceived this would make  
39 them anxious. One participant did not ask questions, because she did not want to know details  
40 about her diagnosis. Four participants commented that they asked questions of their doctor  
41 during the consultation to clarify the need for the scan.  
42  
43  
44

45  
46 According to most participants, discussion about the pros and cons of their scan was not  
47 desirable because they had already received adequate information and had acquired a good  
48 understanding of the risks and benefits. Two participants noted that their doctor explained the  
49 pros and cons of their scan to them, and nine participants commented that this was not  
50 explained to them. Three participants reported their belief that they needed to have the scan  
51 done and therefore did not consider that questions about the pros and cons of the scan were  
52 necessary. One participant reflected that he should have asked about the pros and cons of his  
53 scan, however he understood that his scan was a straightforward CT scan.  
54  
55  
56  
57  
58  
59  
60

1  
2  
3 Most participants reported that as far as they were aware there were no major disadvantages  
4 of having a CT scan and the most important thing was to find out what was wrong with their  
5 health. Several participants considered that CT scans were safe. Other participants noted  
6 some disadvantages of CT scans. Four participants noted that people should not be exposed  
7 to CT scans too often due to radiation although this risk was considered minimal. Several  
8 participants reported that their doctor had informed them of this risk. According to one  
9 patient:

10  
11  
12  
13  
14  
15  
16 ‘Why would there be a disadvantage [of the CT scan]? ... I’ve had three CT scans in 12  
17 months, so I don’t find that over excessive.’ (P1)

### 18 19 20 21 **Uncertainty about questioning**

22  
23 In the theme ‘Uncertainty about questioning’, participants explained their hesitation about  
24 using the five Choosing Wisely questions in discussions with doctors. Eighteen participants  
25 commented that they had not seen the five Choosing Wisely questions before. According to  
26 one patient:

27  
28  
29  
30  
31  
32  
33  
34  
35  
36  
37  
38  
39  
40  
41  
42  
43  
44  
45  
46  
47  
48  
49  
50  
51  
52  
53  
54  
55  
56  
57  
58  
59  
60  
‘It’s a scary thing to ask questions you really sometimes don’t want to hear what they’ve [the  
doctor] got to say.’ (P9)

Many participants commented that people without a trusting relationship with their doctor  
would need to ask questions. Other participants considered that patients would only be able to  
ask questions of their doctor if they had a trusting relationship. According to one participant,  
the five Choosing Wisely questions were the normal questions that she would ask of her  
doctor. Another participant noted that he had never thought to ask questions such as the five  
Choosing Wisely questions.

Six participants commented that they would not use the five Choosing Wisely questions, as  
they needed their scan in order to recover their health. Several participants commented that  
they would never opt to do nothing and therefore they would not ask their doctor the  
Choosing Wisely question ‘What happens if I don’t do anything?’ According to two  
participants, doctors may not want patients to ask them questions. Further, it was perceived  
that some patients may not want to ask their doctors questions since they may feel that  
questioning the doctor is too confrontational. One patient noted:

1  
2  
3 ‘Do I really need this test or procedure? I think it’s almost questioning the doctor. I think  
4 there is potential for some doctors to have their nose out of joint’. (P7)  
5  
6

### 7 Valuing the Choosing Wisely questions 8 9

10 Fourteen participants expressed a range of views about the value of the questions. Several  
11 participants considered the questions were valuable because they guided patients to reflect on  
12 decisions with their doctor and to take greater responsibility for their healthcare decisions.  
13

14 Two participants reported that the questions would be valuable because they would increase  
15 the information available to patients, which would be reassuring for patients in making  
16 decisions with their doctors. Another two participants noted that the questions would be  
17 valuable as a memory prompt for patients. According to one patient:  
18  
19  
20  
21  
22

23 ‘I know they [GPs] want to keep to their time. But I think it [the five Choosing Wisely  
24 questions] might jolt a person’s memory. It might engage the patient on a different level. You  
25 know outside their paradigm of thinking. So it’s a bit like a safety map. (P18)  
26  
27  
28

29 Some participants commented that the five Choosing Wisely questions were valuable because  
30 availability of the questions would give patients permission to ask questions of their doctors.  
31 According to one participant, some people believed that they were not permitted to ask their  
32 doctors questions and needed to know that asking doctors questions was acceptable. Several  
33 participants noted that the questions would need to be brought to patients’ attention by  
34 doctors to signal to patients that it was acceptable to ask questions. One participant noted that  
35 the questions would be valuable for patients who did not speak English well.  
36  
37  
38  
39  
40  
41

42 ‘But for the people who can’t speak English it’s very, very hard and scary to ask any  
43 questions because they don’t know how to ask, or they’re scared that they will say it  
44 wrongly.’ (Carer, P19)  
45  
46  
47  
48

49 Additionally, participants commented on a range of facilitators and barriers to using the five  
50 Choosing Wisely questions. These are listed in Supplementary File 3.  
51  
52

## 53 Discussion 54 55

56 Findings indicate that participants presented to their GP with a health problem that they  
57 needed to understand and address. Participants accepted their GPs decision to prescribe a CT  
58 scan to identify the nature of the problem. Participants reported ambivalence about engaging  
59  
60

1  
2  
3 in shared decision-making with their doctor; although, many participants reported valuing the  
4 Choosing Wisely questions. Few past studies have examined shared decision-making and  
5 Choosing Wisely from the patient perspective<sup>17 18</sup>. Findings from the current study contribute  
6 knowledge about shared decision-making which can be used to inform implementation of the  
7 five Choosing Wisely questions into practice.  
8  
9

10  
11  
12 Previous research about shared decision-making has found decision support tools with clearly  
13 articulated decision choices are effective<sup>6 19 21</sup>. However, shared decision-making in Choosing  
14 Wisely emphasises de-implementation of low value care including a watch and wait  
15 approach<sup>1 9</sup>. In the current study, findings indicate that all participants perceived that they  
16 required a solution to their health problem in the form of an investigatory intervention. Most  
17 participants expected that their GP would make this decision and that the tests would be  
18 beneficial. This finding is aligned with previous research that patients overestimate the  
19 benefits and underestimate the harms of medical interventions<sup>8 18</sup>.  
20  
21  
22

23  
24  
25 Most participants expressed ambivalence about using the five Choosing Wisely questions in  
26 conversations with their GP. This indicates that implementation of the five Choosing Wisely  
27 questions into practice is complicated by patients' beliefs, attitudes, knowledge and  
28 emotions<sup>26</sup>. Although these findings are suggested in the Choosing Wisely literature  
29 emphasising the need to change patients' expectations<sup>4 18</sup> few studies have examined  
30 implementation facilitators and barriers from patients' perspectives. The current study  
31 highlights the role of patients' motivation in shared decision-making and de-implementation  
32 of low value care. Some participants commented on the value of the five Choosing Wisely  
33 questions as a signal that patients were permitted to ask questions of their doctor. The  
34 availability and application of communication tools such as the five Choosing Wisely  
35 questions may assist patients in addressing their lack of knowledge and the power imbalance  
36 between patients and clinicians.  
37  
38  
39  
40  
41  
42  
43  
44  
45  
46  
47

48  
49 Our findings also indicate a lack of consumer and patient awareness of the five questions.  
50 This is reflective of the emphasis to date of the Choosing Wisely campaign upon  
51 disinvestment by health practitioners and healthcare organisations in low value care, without  
52 similar efforts being made to educate patients and consumers about how to engage in shared  
53 decision-making by using the five questions.  
54  
55  
56  
57  
58  
59  
60



## Further research

The five Choosing Wisely questions are a communication rather than a decision support tool. Research about decision support tools inclusive of communication guides, and de-implementation in primary care contexts is warranted. Research with larger representative samples to ascertain patients' perspectives would add knowledge at population levels. Further research is required in regard to the implementation of the five Choosing Wisely questions in defined populations with potentially different motivation for shared decision-making such as people living with chronic illness engaged in self-management.

## Study strengths and limitations

This was a qualitative study using purposive sampling and no claims can be made that generalise findings to populations. We argue, however, that findings from the current study have application to similar contexts of care elsewhere. The study included a small sample using semi-structured interviews. This enabled a detailed descriptive exploration of participant's attitudes, beliefs and knowledge, and identification of factors and processes facilitating and constraining patients' use of the Choosing Wisely questions.

## Conclusions and Implications for Practice

Shared decision-making is a principle underpinning Choosing Wisely. This ideal may not be matched in practice where patients seek a solution from an authoritative expert clinician such as a medical practitioner. Patients may require education that they are permitted to ask questions of their medical practitioner. Patients' motivation to engage in shared decision-making requires clinicians' understanding of patients' attitudes, beliefs, knowledge and emotions. Systems support and education for healthcare practitioners in effective communication is essential. However, this needs to emphasise communication with patients with varying motivation to engage in shared decision-making. Skilful application with patients of available communication tools, such as the five Choosing Wisely questions, and paid clinician time to undertake this important healthcare practice, are imperative to future success in implementation of Choosing Wisely.

## References

1. Wolfson D, Santa J, Slass L. Engaging physicians and consumers in conversations about treatment overuse and waste: a short history of the choosing wisely campaign. *Academic Medicine: Journal Of The Association Of American Medical Colleges* 2014;89(7):990-95. doi: 10.1097/ACM.0000000000000270
2. Greene SE, Massone R. A survey of emergency medicine residents' perspectives of the choosing wisely campaign. Philadelphia, Pennsylvania: Elsevier B.V., 2015:853-55.
3. Zikmund-Fisher B, Kullgren J, Fagerlin A, et al. Perceived Barriers to Implementing Individual Choosing Wisely® Recommendations in Two National Surveys of Primary Care Providers. *JGIM: Journal of General Internal Medicine* 2017;32(2):210-17. doi: 10.1007/s11606-016-3853-5
4. Schlesinger M, Grob R. Treating, Fast and Slow: Americans' Understanding of and Responses to Low-Value Care. *Milbank Quarterly* 2017;95(1):70-116. doi: 10.1111/1468-0009.12246
5. Levinson W, Kallewaard M, Bhatia RS, et al. 'Choosing Wisely': a growing international campaign. *BMJ Quality & Safety* 2015;24(2):167-74. doi: 10.1136/bmjqs-2014-003821
6. Stacey D, Legare F, Lewis KB, et al. Decision aids to help people who are facing health treatment or screening decisions. *Cochrane Database of Systematic Reviews* 2017 doi: DOI: 10.1002/14651858.CD001431.pub5
7. Joseph-Williams N, Elwyn G, Edwards AG. Knowledge is not power for patients: a systematic review and thematic synthesis of patient-reported barriers and facilitators to shared decision making. *Patient Education & Counseling* 2014;94(3):291-309.
8. Hoffmann T, Del Mar C. Patients' expectations of the benefits and harms of treatments, screening, and tests: A systematic review. *Journal of the American Medical Association* 2015;175:274-86.
9. Choosing Wisely. Choosing Wisely: A Special Report on the first five years USA2019 [Available from: <http://www.choosingwisely.org/wp-content/uploads/2017/10/Choosing-Wisely-at-Five.pdf>].
10. Hahn C, Kavanagh B, Bhatnagar A, et al. Choosing wisely: The American Society for radiation oncology's top 5 list. *Practical Radiation Oncology* 2014;4(6):349-55.
11. Lusiani L, Frediani R, Nardi R, et al. Doing more does not mean doing better: The FACOI contribution to the slow medicine program for a sustainable and wise healthcare system. *Italian Journal of Medicine* 2015;9(3):281-86.
12. Simos D, Hutton B, Clemons M. Are Physicians Choosing Wisely When Imaging for Distant Metastases in Women With Operable Breast Cancer? *Journal of Oncology Practice* 2015;11(1):62-68. doi: 10.1200/JOP.2014.000125

13. Figar S, Finakly S, Wong CJ, et al. Retrospective audit of plain film imaging in acute ankle trauma: Are we choosing wisely? *Journal of Medical Imaging and Radiation Oncology* 2017;61:149-50.
14. Hair H, Boudreau D, Rice C, et al. A patient focused information design intervention to support the mTBI Choosing Wisely recommendation. *Canadian Journal of Emergency Medicine* 2017;19:S71.
15. Lin MP, Nguyen T, Probst MA, et al. Emergency Physician Knowledge, Attitudes, and Behavior Regarding ACEP's Choosing Wisely Recommendations: A Survey Study. *Academic Emergency Medicine* 2017;24(6):668-75. doi: 10.1111/acem.13167
16. Gieniusz M, Kozikowski A, Williams M, et al. Peg tubes in patients with advanced dementia: Are we 'choosing wisely?'. *Journal of the American Geriatrics Society* 2017;65:S77.
17. Silverstein W, Lass E, Born KB, et al. A survey of primary care patients' readiness to engage in the de-adoption practices recommended by Choosing Wisely Canada. *BMC Research Notes* 2016;9:301-8.
18. NPS MedicineWise. Choosing Wisely Australia 2017 report. Canberra: Choosing Wisely Australia, 2017.
19. Clifford AM, Ryan J, Walsh C, et al. What information is used in treatment decision aids? A systematic review of the types of evidence populating health decision aids. *BMC Medical Informatics & Decision Making* 2017;17:1-15. doi: 10.1186/s12911-017-0415-7
20. Choosing Wisely Australia. 5 questions to ask your doctor or other healthcare provider 2019 [Available from: <http://www.choosingwisely.org.au/resources/consumers/5-questions-to-ask-your-doctor>].
21. Pollard S, Bansback N, Bryan S. Physician attitudes toward shared decision making: A systematic review. *Patient Education & Counseling* 2015;98(9):1046-57. doi: 10.1016/j.pec.2015.05.004
22. Elwyn G, Scholl I, Tietbohl C, et al. 'Many miles to go ...': a systematic review of the implementation of patient decision support interventions into routine clinical practice. *BMC Medical Informatics & Decision Making* 2013;13:S14-S14. doi: 10.1186/1472-6947-13-S2-S14
23. O'Brien B, Harris I, Beckman T, et al. Standards for reporting qualitative research: A synthesis of recommendations. *Academic Medicine: Journal Of The Association Of American Medical Colleges* 2014;89(9):1245-51.
24. Cane J, O'Connor D, Michie S. Validation of the theoretical domains framework for use in behaviour change and implementation research. *Implementation Science* 2012;7:37-53. doi: 10.1186/1748-5908-7-37
25. Michie S, Johnson M, Abraham C, et al. Making psychological theory useful for implementing evidence based practice: a consensus approach. *Quality and Safety in HealthCare* 2005;14:26-33.

- 1  
2  
3 26. Atkins L, Francis J, Islam R, et al. A guide to using the Theoretical Domains Framework  
4 of behaviour change to investigate implementation problems. *Implementation Science*  
5 2017;12:77. doi: <https://doi.org/10.1186/s13012-017-0605-9>  
6  
7  
8 27. Spencer L, Ritchie J, Ormston R, et al. Analysis principles and processes. In: Ritchie J,  
9 Lewis J, McNaughton Nicholls C, et al., eds. *Qualitative Research Practice: A Guide*  
10 *for Social Science Students & Researchers*. London: Sage 2014:269-95.  
11  
12 28. Spencer L, Ritchie J, O'Connor W, et al. Analysis in practice. In: Ritchie J, Lewis C,  
13 McNaughton Nicholls C, et al., eds. *Qualitative Research Practice: A Guide for Social*  
14 *Science Students & Researchers*. London: Sage 2014:295-347.  
15  
16  
17  
18  
19  
20  
21  
22  
23  
24  
25  
26  
27  
28  
29  
30  
31  
32  
33  
34  
35  
36  
37  
38  
39  
40  
41  
42  
43  
44  
45  
46  
47  
48  
49  
50  
51  
52  
53  
54  
55  
56  
57  
58  
59  
60

For peer review only

## Supplementary File 1: Study Protocol

You are being asked to participate in this research project because we would like to know your views with respect to the use of some questions. These questions are recommended for use by patients in conversation with their general practitioner when deciding to have a CT scan. The recommended questions are:

1. Do I really need this test or procedure?
2. What are the risks?
3. Are there simpler, safer options?
4. What happens if I don't do anything?
5. What are the costs?

The interview should take approximately 30-45 minutes and with your permission it will be digitally-recorded to ensure that all key points are accurately documented. Any identifying information (for example the names of other individuals) that you use in the course of our discussion will be removed from the interview transcripts. If you wish to end the interview before I have asked all of the questions or if you wish to withdraw from the study you are free to do so.

There may appear to be overlap between the interview questions that form part of the interview. Each question is worded to obtain specific information and so you may find that answers are repeated. It is important to note that there are no right or wrong answers to the questions and that no one will know what your specific answers were.

Note to the Interviewer: Depending on how the participant answers the questions, the order in which these questions are asked can change.

### Questions

1. Tell me about your visit to medical imaging?

Prompts:

What test are you having?

What are you having the test for?

What is the most important thing about having the test?

What are the disadvantages of having the test?)

2. Tell me about the decision to have the test?

Prompts:

Did you have a discussion/ask about it as an option with your doctor?

What was important in the discussion?

What questions did you ask?

What was missing in the discussion? i.e. was there information that you desired, but did not receive?

3. Was the reason/pros and cons for having the test explained to you?

Prompts:

What were the benefits of having the test done?

What were the negative aspects of having the test done?

Did you feel you had an option to choose (or choose not) to have the test done?

- 1  
2  
3           ○ How did you come to your decision?  
4 4. Did deciding to have the test cause you anxiety or stress? If yes, can you explain?  
5       Alternative to Question 4:  
6

7           What feelings or emotions did you feel when deciding to have the test?  
8

- 9 5. Do you know other patient(s) who have had the test done?  
10       Prompts:  
11       Did this influence your opinion of the test? (“Good or bad” to have it done?)  
12 6. Have you heard of the following five questions that you can use to find out information  
13 from your doctor about your test?  
14  
15

16 (Instructions for interviewer: Provide patient with printed list of the following questions)

- 17 1. Do I really need this test or procedure?  
18 2. What are the risks?  
19 3. Are there simpler, safer options?  
20 4. What happens if I don't do anything?  
21 5. What are the costs?  
22 7. If patients new about these questions, do you think they would ask the questions of their  
23 doctors?  
24       Prompts:  
25       What would help them to ask?  
26       What would stop them asking these questions?  
27  
28 8. Do you think the five questions would help patients to weigh up the benefits compared to  
29 the risks of having the test?  
30       Prompts:  
31       If so, how would the questions help?  
32       If not, can you tell me more about why?  
33  
34 9. Do you have any suggestions for how to inform patients about these questions? If so, what  
35 are your suggestions?  
36  
37  
38  
39  
40  
41  
42  
43  
44  
45  
46  
47  
48  
49  
50  
51  
52  
53  
54  
55  
56  
57  
58  
59  
60

**Supplementary File 2. Demographic Characteristics of Participants (N=22)**

| Demographic information                   | Frequency (%) |
|-------------------------------------------|---------------|
| Country of birth                          |               |
| Australia/NZ                              | 13 (59.1)     |
| United Kingdom                            | 3 (13.6)      |
| Hungary                                   | 2 (9.1)       |
| China                                     | 2 (9.1)       |
| South Africa                              | 1 (4.5)       |
| Netherlands                               | 1 (4.5)       |
| Completed secondary school education      |               |
| Year 12                                   | 9 (30.0)      |
| Year 11                                   | 6 (20.0)      |
| Year 10                                   | 4 (13.3)      |
| Less than year 9                          | 3 (10.0)      |
| Completed post secondary school education |               |
| University degree                         | 6 (27.3)      |
| Vocational Education and Training         | 8 (26.7)      |
| Nil                                       | 8 (26.7)      |
| Occupation                                |               |
| Registered nurse/Enrolled nurse           | 3 (13.6)      |
| Housekeeper/cook                          | 3 (13.6)      |
| Teacher                                   | 2 (9.1)       |
| Home duties                               | 2 (9.1)       |
| Manager/accounting                        | 2 (9.1)       |
| Unemployed                                | 2 (9.1)       |
| Other                                     | 8 (36.4)      |

---

**Income source**

|                                    |          |
|------------------------------------|----------|
| Employed                           | 8 (36.4) |
| Self-funded retirement             | 3 (13.6) |
| Unemployment or disability benefit | 3 (13.6) |
| Old age pension/veterans' pension  | 8 (36.4) |

**Retired**

|     |           |
|-----|-----------|
| Yes | 11 (50.0) |
| No  | 11 (50.0) |

---



## Supplementary File 3: Facilitators and Barriers to using the Five Choosing Wisely Questions

---

### Facilitators and barriers

---

#### Facilitators

##### **A good relationship with the doctor**

A good relationship to the doctor who can explain things

Doctors who are patient friendly

Doctors who have empathy

##### **Availability in different languages**

Five Choosing Wisely questions need to be available in different languages

##### **Advertise the questions**

Advertise the five Choosing Wisely questions (TV, Social Media, Presentations)

Make information available on the Monash Health website – Do you know your rights? Do you know that you can ask questions?

##### **Educate patients that they are allowed to ask questions**

Assist patients to know about the five Choosing Wisely questions

Place signs up in clinics ‘These are your rights’

Make the questions available in the GP reception area

Ensure that the questions are on the wall in the clinic, posters

List of questions available on the table in the waiting room, on the wall so that everybody can see them

Questions available in the clinic waiting room

Ensure an official logo is on the questions to show that they are endorsed by doctors

Pamphlet or card that is handed out at the clinic

Give patients a card with the questions so that they remember to ask

A question sheet in the clinic ‘Have you asked these questions, Did you know that you could ask these questions?’

Doctor could hand patient the questions. These are your rights

The GP could prompt the patient to use the questions

Questions available at the point of contact with the GP

GPs explain the questions

At the reception, give patients the questions every time they saw a doctor, on a little card, you are allowed to ask questions when you see a doctor, here are a few

**Format and title of the questions**

Questions need to be in bold so that people can read them

Title of the questions 'Being better informed, questions to help your care'

**Barriers****Fear and embarrassment**

Fear of asking the questions

Fear of the answer to the questions

Fear of asking the questions the wrong way (CALD patients)

Embarrassing to ask questions because don't know how to ask (CALD patients)

Some people may not be comfortable with the word 'risk'

Fear of offending the doctor, appearing to question the doctor's knowledge

**Too unwell to ask questions**

Too unwell or overwhelmed with the medical problem to ask questions

People experiencing pain

**Lack of awareness of the need for questions**

Lack of awareness of the need to ask questions

The patient thought they knew the answers already (by using the internet, previous experience of a CT scan)

**Patients who do not speak English**

People who do not speak or read English will not be able to use the questions

**Doctors who are not approachable**

Limited GP time

Doctors are in a rush

Doctors are encouraged to have very short consultations with their patients

Doctors who are intimidating

Doctors who are not approachable

---

# Reporting checklist for qualitative study.

Based on the SRQR guidelines.

## Instructions to authors

Complete this checklist by entering the page numbers from your manuscript where readers will find each of the items listed below.

Your article may not currently address all the items on the checklist. Please modify your text to include the missing information. If you are certain that an item does not apply, please write "n/a" and provide a short explanation.

Upload your completed checklist as an extra file when you submit to a journal.

In your methods section, say that you used the SRQR reporting guidelines, and cite them as:

O'Brien BC, Harris IB, Beckman TJ, Reed DA, Cook DA. Standards for reporting qualitative research: a synthesis of recommendations. Acad Med. 2014;89(9):1245-1251.

|              | Reporting Item                                                                                                                                                                                                                                        | Page Number |
|--------------|-------------------------------------------------------------------------------------------------------------------------------------------------------------------------------------------------------------------------------------------------------|-------------|
| <b>Title</b> | <p><u>#1</u> Concise description of the nature and topic of the study identifying the study as qualitative or indicating the approach (e.g. ethnography, grounded theory) or data collection methods (e.g. interview, focus group) is recommended</p> | Title page  |

## Abstract

|    |                       |                    |                                                        |     |
|----|-----------------------|--------------------|--------------------------------------------------------|-----|
| 1  |                       | <a href="#">#2</a> | Summary of the key elements of the study               | 2   |
| 2  |                       |                    |                                                        |     |
| 3  |                       |                    |                                                        |     |
| 4  |                       |                    | using the abstract format of the intended              |     |
| 5  |                       |                    |                                                        |     |
| 6  |                       |                    | publication; typically includes background,            |     |
| 7  |                       |                    |                                                        |     |
| 8  |                       |                    | purpose, methods, results and conclusions              |     |
| 9  |                       |                    |                                                        |     |
| 10 |                       |                    |                                                        |     |
| 11 | <b>Introduction</b>   |                    |                                                        |     |
| 12 |                       |                    |                                                        |     |
| 13 |                       |                    |                                                        |     |
| 14 | Problem formulation   | <a href="#">#3</a> | Description and significance of the problem /          | 4-6 |
| 15 |                       |                    |                                                        |     |
| 16 |                       |                    | phenomenon studied: review of relevant theory          |     |
| 17 |                       |                    |                                                        |     |
| 18 |                       |                    | and empirical work; problem statement                  |     |
| 19 |                       |                    |                                                        |     |
| 20 |                       |                    |                                                        |     |
| 21 |                       |                    |                                                        |     |
| 22 | Purpose or research   | <a href="#">#4</a> | Purpose of the study and specific objectives or        | 6   |
| 23 |                       |                    |                                                        |     |
| 24 | question              |                    | questions                                              |     |
| 25 |                       |                    |                                                        |     |
| 26 |                       |                    |                                                        |     |
| 27 | <b>Methods</b>        |                    |                                                        |     |
| 28 |                       |                    |                                                        |     |
| 29 |                       |                    |                                                        |     |
| 30 | Qualitative approach  | <a href="#">#5</a> | Qualitative approach (e.g. ethnography,                | 6   |
| 31 |                       |                    |                                                        |     |
| 32 | and research paradigm |                    | grounded theory, case study, phenomenology,            |     |
| 33 |                       |                    |                                                        |     |
| 34 |                       |                    | narrative research) and guiding theory if              |     |
| 35 |                       |                    |                                                        |     |
| 36 |                       |                    | appropriate; identifying the research paradigm         |     |
| 37 |                       |                    |                                                        |     |
| 38 |                       |                    | (e.g. postpositivist, constructivist / interpretivist) |     |
| 39 |                       |                    |                                                        |     |
| 40 |                       |                    | is also recommended; rationale. The rationale          |     |
| 41 |                       |                    |                                                        |     |
| 42 |                       |                    | should briefly discuss the justification for           |     |
| 43 |                       |                    |                                                        |     |
| 44 |                       |                    | choosing that theory, approach, method or              |     |
| 45 |                       |                    |                                                        |     |
| 46 |                       |                    | technique rather than other options available;         |     |
| 47 |                       |                    |                                                        |     |
| 48 |                       |                    | the assumptions and limitations implicit in            |     |
| 49 |                       |                    |                                                        |     |
| 50 |                       |                    | those choices and how those choices influence          |     |
| 51 |                       |                    |                                                        |     |
| 52 |                       |                    | study conclusions and transferability. As              |     |
| 53 |                       |                    |                                                        |     |
| 54 |                       |                    |                                                        |     |
| 55 |                       |                    |                                                        |     |
| 56 |                       |                    |                                                        |     |
| 57 |                       |                    |                                                        |     |
| 58 |                       |                    |                                                        |     |
| 59 |                       |                    |                                                        |     |
| 60 |                       |                    |                                                        |     |

appropriate the rationale for several items

might be discussed together.

|    |                     |                     |     |
|----|---------------------|---------------------|-----|
| 1  |                     |                     |     |
| 2  |                     |                     |     |
| 3  |                     |                     |     |
| 4  |                     |                     |     |
| 5  |                     |                     |     |
| 6  | Researcher          | <a href="#">#6</a>  | 8   |
| 7  |                     |                     |     |
| 8  | characteristics and |                     |     |
| 9  |                     |                     |     |
| 10 | reflexivity         |                     |     |
| 11 |                     |                     |     |
| 12 |                     |                     |     |
| 13 |                     |                     |     |
| 14 |                     |                     |     |
| 15 |                     |                     |     |
| 16 |                     |                     |     |
| 17 |                     |                     |     |
| 18 |                     |                     |     |
| 19 |                     |                     |     |
| 20 |                     |                     |     |
| 21 |                     |                     |     |
| 22 |                     |                     |     |
| 23 |                     |                     |     |
| 24 |                     |                     |     |
| 25 | Context             | <a href="#">#7</a>  | 6   |
| 26 |                     |                     |     |
| 27 |                     |                     |     |
| 28 |                     |                     |     |
| 29 |                     |                     |     |
| 30 | Sampling strategy   | <a href="#">#8</a>  | 7   |
| 31 |                     |                     |     |
| 32 |                     |                     |     |
| 33 |                     |                     |     |
| 34 |                     |                     |     |
| 35 |                     |                     |     |
| 36 |                     |                     |     |
| 37 |                     |                     |     |
| 38 |                     |                     |     |
| 39 |                     |                     |     |
| 40 | Ethical issues      | <a href="#">#9</a>  | 8   |
| 41 |                     |                     |     |
| 42 | pertaining to human |                     |     |
| 43 |                     |                     |     |
| 44 | subjects            |                     |     |
| 45 |                     |                     |     |
| 46 |                     |                     |     |
| 47 |                     |                     |     |
| 48 |                     |                     |     |
| 49 |                     |                     |     |
| 50 | Data collection     | <a href="#">#10</a> | 7-8 |
| 51 |                     |                     |     |
| 52 | methods             |                     |     |
| 53 |                     |                     |     |
| 54 |                     |                     |     |
| 55 |                     |                     |     |
| 56 |                     |                     |     |
| 57 |                     |                     |     |
| 58 |                     |                     |     |
| 59 |                     |                     |     |
| 60 |                     |                     |     |

1 triangulation of sources / methods, and  
 2  
 3 modification of procedures in response to  
 4  
 5 evolving study findings; rationale  
 6  
 7

|                                                                                                                |                                              |                     |                                                                                                                                                                                                                            |                           |
|----------------------------------------------------------------------------------------------------------------|----------------------------------------------|---------------------|----------------------------------------------------------------------------------------------------------------------------------------------------------------------------------------------------------------------------|---------------------------|
| 8<br>9<br>10<br>11<br>12<br>13<br>14<br>15<br>16<br>17<br>18<br>19                                             | Data collection instruments and technologies | <a href="#">#11</a> | Description of instruments (e.g. interview guides, questionnaires) and devices (e.g. audio recorders) used for data collection; if / how the instruments(s) changed over the course of the study                           | 7, Supplementary file 1   |
| 20<br>21<br>22<br>23<br>24<br>25<br>26<br>27<br>28<br>29                                                       | Units of study                               | <a href="#">#12</a> | Number and relevant characteristics of participants, documents, or events included in the study; level of participation (could be reported in results)                                                                     | 8-9, Supplementary file 2 |
| 30<br>31<br>32<br>33<br>34<br>35<br>36<br>37<br>38<br>39<br>40<br>41                                           | Data processing                              | <a href="#">#13</a> | Methods for processing data prior to and during analysis, including transcription, data entry, data management and security, verification of data integrity, data coding, and anonymisation / deidentification of excerpts | 7-8                       |
| 42<br>43<br>44<br>45<br>46<br>47<br>48<br>49<br>50<br>51<br>52<br>53<br>54<br>55<br>56<br>57<br>58<br>59<br>60 | Data analysis                                | <a href="#">#14</a> | Process by which inferences, themes, etc. were identified and developed, including the researchers involved in data analysis; usually references a specific paradigm or approach; rationale                                | 8                         |

|    |                         |                     |                                                   |       |
|----|-------------------------|---------------------|---------------------------------------------------|-------|
| 1  | Techniques to enhance   | <a href="#">#15</a> | Techniques to enhance trustworthiness and         | 8     |
| 2  |                         |                     |                                                   |       |
| 3  | trustworthiness         |                     | credibility of data analysis (e.g. member         |       |
| 4  |                         |                     | checking, audit trail, triangulation); rationale  |       |
| 5  |                         |                     |                                                   |       |
| 6  |                         |                     |                                                   |       |
| 7  |                         |                     |                                                   |       |
| 8  |                         |                     |                                                   |       |
| 9  | <b>Results/findings</b> |                     |                                                   |       |
| 10 |                         |                     |                                                   |       |
| 11 |                         |                     |                                                   |       |
| 12 | Syntheses and           | <a href="#">#16</a> | Main findings (e.g. interpretations, inferences,  | 8-13  |
| 13 |                         |                     |                                                   |       |
| 14 | interpretation          |                     | and themes); might include development of a       |       |
| 15 |                         |                     | theory or model, or integration with prior        |       |
| 16 |                         |                     | research or theory                                |       |
| 17 |                         |                     |                                                   |       |
| 18 |                         |                     |                                                   |       |
| 19 |                         |                     |                                                   |       |
| 20 |                         |                     |                                                   |       |
| 21 |                         |                     |                                                   |       |
| 22 | Links to empirical data | <a href="#">#17</a> | Evidence (e.g. quotes, field notes, text          | 8-13  |
| 23 |                         |                     |                                                   |       |
| 24 |                         |                     | excerpts, photographs) to substantiate analytic   |       |
| 25 |                         |                     | findings                                          |       |
| 26 |                         |                     |                                                   |       |
| 27 |                         |                     |                                                   |       |
| 28 |                         |                     |                                                   |       |
| 29 | <b>Discussion</b>       |                     |                                                   |       |
| 30 |                         |                     |                                                   |       |
| 31 |                         |                     |                                                   |       |
| 32 |                         |                     |                                                   |       |
| 33 | Intergration with prior | <a href="#">#18</a> | Short summary of main findings; explanation of    | 13-14 |
| 34 |                         |                     |                                                   |       |
| 35 | work, implications,     |                     | how findings and conclusions connect to,          |       |
| 36 |                         |                     | support, elaborate on, or challenge conclusions   |       |
| 37 | transferability and     |                     | of earlier scholarship; discussion of scope of    |       |
| 38 |                         |                     | application / generalizability; identification of |       |
| 39 | contribution(s) to the  |                     | unique contributions(s) to scholarship in a       |       |
| 40 |                         |                     | discipline or field                               |       |
| 41 | field                   |                     |                                                   |       |
| 42 |                         |                     |                                                   |       |
| 43 |                         |                     |                                                   |       |
| 44 |                         |                     |                                                   |       |
| 45 |                         |                     |                                                   |       |
| 46 |                         |                     |                                                   |       |
| 47 |                         |                     |                                                   |       |
| 48 |                         |                     |                                                   |       |
| 49 | Limitations             | <a href="#">#19</a> | Trustworthiness and limitations of findings       | 15    |
| 50 |                         |                     |                                                   |       |
| 51 |                         |                     |                                                   |       |
| 52 | <b>Other</b>            |                     |                                                   |       |
| 53 |                         |                     |                                                   |       |
| 54 |                         |                     |                                                   |       |
| 55 |                         |                     |                                                   |       |
| 56 |                         |                     |                                                   |       |
| 57 |                         |                     |                                                   |       |
| 58 |                         |                     |                                                   |       |
| 59 |                         |                     |                                                   |       |
| 60 |                         |                     |                                                   |       |

|    |                       |                     |                                                |                    |
|----|-----------------------|---------------------|------------------------------------------------|--------------------|
| 1  | Conflicts of interest | <a href="#">#20</a> | Potential sources of influence of perceived    | The authors report |
| 2  |                       |                     |                                                |                    |
| 3  |                       |                     |                                                |                    |
| 4  |                       |                     | influence on study conduct and conclusions;    | no conflict of     |
| 5  |                       |                     |                                                |                    |
| 6  |                       |                     | how these were managed                         | interest, page 3   |
| 7  |                       |                     |                                                |                    |
| 8  |                       |                     |                                                |                    |
| 9  | Funding               | <a href="#">#21</a> | Sources of funding and other support; role of  | 3                  |
| 10 |                       |                     |                                                |                    |
| 11 |                       |                     | funders in data collection, interpretation and |                    |
| 12 |                       |                     |                                                |                    |
| 13 |                       |                     | reporting                                      |                    |
| 14 |                       |                     |                                                |                    |
| 15 |                       |                     |                                                |                    |

16 None The SRQR checklist is distributed with permission of Wolters Kluwer © 2014 by the Association  
17 of American Medical Colleges. This checklist can be completed online using  
18  
19 <https://www.goodreports.org/>, a tool made by the [EQUATOR Network](#) in collaboration with  
20  
21 [Penelope.ai](#)  
22  
23  
24  
25  
26  
27  
28  
29  
30  
31  
32  
33  
34  
35  
36  
37  
38  
39  
40  
41  
42  
43  
44  
45  
46  
47  
48  
49  
50  
51  
52  
53  
54  
55  
56  
57  
58  
59  
60



# BMJ Open

## Semi-structured interviews regarding patients' perceptions of Choosing Wisely and shared decision-making: An Australian study

|                                 |                                                                                                                                                                                                                                                                                                                                                                                                                                                                              |
|---------------------------------|------------------------------------------------------------------------------------------------------------------------------------------------------------------------------------------------------------------------------------------------------------------------------------------------------------------------------------------------------------------------------------------------------------------------------------------------------------------------------|
| Journal:                        | <i>BMJ Open</i>                                                                                                                                                                                                                                                                                                                                                                                                                                                              |
| Manuscript ID                   | bmjopen-2019-031831.R1                                                                                                                                                                                                                                                                                                                                                                                                                                                       |
| Article Type:                   | Research                                                                                                                                                                                                                                                                                                                                                                                                                                                                     |
| Date Submitted by the Author:   | 10-Jul-2019                                                                                                                                                                                                                                                                                                                                                                                                                                                                  |
| Complete List of Authors:       | Allen, Jacqueline; Monash University, School of Nursing and Midwifery King, Richard ; Monash Health<br>Goergen, Stacy; Monash University, Imaging; Monash Health, Radiology<br>Melder, Angela; Monash Univeristy, Monash Centre for Health Research and Implementation,<br>Neeman, Naama; Hudson Institute of Medical Research<br>Hadley, Annemarie; Monash Health<br>Hutchinson, Alison; Deakin University School of Nursing and Midwifery, School of Nursing and Midwifery |
| <b>Primary Subject Heading</b>: | Health services research                                                                                                                                                                                                                                                                                                                                                                                                                                                     |
| Secondary Subject Heading:      | Patient-centred medicine                                                                                                                                                                                                                                                                                                                                                                                                                                                     |
| Keywords:                       | Quality in health care < HEALTH SERVICES ADMINISTRATION & MANAGEMENT, Organisation of health services < HEALTH SERVICES ADMINISTRATION & MANAGEMENT, QUALITATIVE RESEARCH, PUBLIC HEALTH                                                                                                                                                                                                                                                                                     |
|                                 |                                                                                                                                                                                                                                                                                                                                                                                                                                                                              |

SCHOLARONE™  
Manuscripts

## **Semi-structured interviews regarding patients' perceptions of Choosing Wisely and shared decision-making: An Australian study**

Short title: Choosing Wisely Patients' Perspectives

Word length: 3,994

Authors:

Jacqueline Allen (corresponding author), RN, PhD, BA (Hons), MPsyCh  
Senior Lecturer  
Monash University, Clayton, Victoria, School of Nursing and Midwifery  
Wellington Rd, Clayton, 3800, Vic, Australia  
tel:+61 03 9905 5440  
[jacqui.allen@monash.edu](mailto:jacqui.allen@monash.edu)

Associate Professor Richard King, MBBS  
Monash Health  
246 Clayton Rd, Clayton, 3168, Vic, Australia  
[rwfk70@gmail.com](mailto:rwfk70@gmail.com)

Adjunct Clinical Professor Stacy Goergen, MBBS, MCLinEpi, FRANZCR  
Director of Research, Monash Imaging, Monash Health  
246 Clayton Rd, Clayton, 3168, Vic, Australia  
[Stacy.Goergen@monashhealth.org](mailto:Stacy.Goergen@monashhealth.org)

Angela Melder B App Sci (Applied Biology), MPH  
Manager Centre for Clinical Effectiveness, Monash Health  
246 Clayton Rd, Clayton, 3168, Vic, Australia  
[angela.melder@monash.edu](mailto:angela.melder@monash.edu)

Naama Neeman MPH  
Children's Cancer Foundation Administrative Director  
Hudson Institute of Medical Research  
[Naama.neeman@hudson.org.au](mailto:Naama.neeman@hudson.org.au)

Anne Marie Hadley MBBS, BHA  
Chief Experience Officer, Monash Health  
246 Clayton Rd, Clayton, 3168, Vic, Australia  
[Annemarie.Hadley@monashhealth.org](mailto:Annemarie.Hadley@monashhealth.org)

Professor Alison M Hutchinson, RN, PhD, BAppSci (Adv Nsg), MBioeth  
Chair in Nursing (Monash Health)  
Deakin University, Geelong, Victoria, School of Nursing and Midwifery; Centre for Quality and Patient Safety Monash Health Partnership, Monash Health  
221 Burwood Hwy, Burwood, 3125, Vic, Australia  
[alison.hutchinson@deakin.edu.au](mailto:alison.hutchinson@deakin.edu.au)

## Abstract

Objectives: To examine how patients perceive shared decision-making regarding computed tomography (CT) scan referral and use of the five Choosing Wisely questions with their general practitioner (GP).

Design: Qualitative exploratory using semi-structured interviews

Setting: A large metropolitan public healthcare organisation in urban Australia.

Participants: Following purposive sampling, 20 patients and 2 carers participated. Patient participants aged 18 years or over were eligible if they were attending the healthcare organisation for a CT scan and referred by their GP. Carers/family were eligible to participate when they were in the role of an unpaid carer and were aged 18 years or over. Participants were required to speak English sufficiently to provide informed consent. Participants with cognitive impairment were excluded.

Findings: Eighteen interviews were conducted with the patient only. Two interviews were conducted with the patient and the patient's carer. Fourteen participants were female. Five themes resulted from the thematic analysis: 1) Needing to know, 2) Questioning doctors is not necessary, 3) Discussing scans is not required, 4) Uncertainty about questioning, and 5) Valuing the Choosing Wisely questions. Participants reported that they presented to their GP with a health problem that they needed to understand and address. Participants accepted their GPs decision to prescribe a CT scan to identify the nature of their problem. They reported ambivalence about engaging in shared decision-making with their doctor, although, many participants reported valuing the Choosing Wisely questions.

Conclusions: Shared decision-making is an important principle underpinning Choosing Wisely. Practice implementation requires understanding patients' motivations to engage in shared decision-making with a focus on attitudes, beliefs, knowledge and emotions. Systems-level support and education for healthcare practitioners in effective communication is important. However, this needs to emphasise communication with patients who have varying degrees of motivation to engage in shared decision-making and Choosing Wisely.

## Article Summary

Strengths and limitations of this study:

- The study employed purposive sampling; therefore, the findings cannot be generalised
- The qualitative methods enabled a detailed examination of patients' attitudes and beliefs
- Factors supporting the implementation of shared decision-making in Choosing Wisely were identified
- The findings have application to similar care contexts elsewhere

Funding statement: This work was supported by funding from Monash Health, Clayton Victoria, Australia.

Competing interests statement: No conflict of interest is reported by the authors.

Author contributions: JA and AH designed and conceptualised the study with RK, SG, AM, NM and AMH. JA recruited participants and collected data, JA and AH analysed data, JA and AH drafted the manuscript with support from RK, SG, AM, NM and AMH.

### Acknowledgements

We are thankful for the support of all patients and carers who generously participated in the study. We acknowledge the support and time of staff at the medical imaging department at Casey Hospital including Nick Ardley, the reception staff and the nursing staff. We acknowledge the support by Monash Health and the Deakin University School of Nursing and Midwifery.

### Keywords

Choosing Wisely, shared decision-making, patients' perspectives, semi-structured interviews

## Introduction

Choosing Wisely is a de-implementation initiative aiming to reduce low value healthcare. Two main principles underpin Choosing Wisely: 1) the responsible stewardship of healthcare resources, and 2) the inclusion of patients in healthcare decisions<sup>1</sup>. Numerous studies have been conducted to assess the implementation of Choosing Wisely in relation to responsible stewardship<sup>2-5</sup>. There is mixed research in relation to shared decision-making. Previous studies have identified that decision support tools facilitate shared decision-making<sup>6 7</sup>. Other research has found that patients overestimate the benefits of medical interventions and underestimate the associated harms<sup>8</sup>. However, few studies have been conducted about shared decision-making from the patient perspective in a de-implementation context such as Choosing Wisely.

### Choosing Wisely

Initiated in 2012 by the American Board of Internal Medicine Foundation, the US-based Consumer Reports, and nine US-based medical specialty societies, the Choosing Wisely campaign aims to avoid healthcare services, including tests and treatments, associated with evidence of low efficacy and / or potential risk of harm to patients<sup>1 4</sup>. Over 20 countries including Canada, Italy, the UK and Australia, have joined the Choosing Wisely initiative. Choosing Wisely emphasises the responsibilities of medical professionals to justly distribute and manage healthcare resources<sup>1 9</sup>. Additionally, Choosing Wisely emphasises shared decision-making between healthcare practitioners and patients<sup>9</sup>.

To date, studies investigating the effectiveness of Choosing Wisely implementation have addressed responsible stewardship in terms of the development of lists of tests and treatments to avoid<sup>10 11</sup>, impact studies<sup>12 13</sup>, education interventions<sup>14</sup> and physician attitudes<sup>15 16</sup>. Previous studies have identified a range of patient attitudes regarding Choosing Wisely. A Canadian study identified that patients endorsed Choosing Wisely values and de-implementing low value care<sup>17</sup>. In an Australian evaluation, 61% of consumer participants indicated that they agreed with the Choosing Wisely campaign and the patient's role in reducing care of low value<sup>18</sup>. However, 61% of participants expected that their medical practitioner should order all medical tests if they were unwell<sup>18</sup>.

## Shared decision-making

Shared decision-making refers to the involvement of patients in making decisions about their health and healthcare with clinicians<sup>6 19</sup>. The Choosing Wisely movement promotes shared decision-making between patients and healthcare professionals in relation to de-implementation of low value care<sup>1 4</sup>. Shared decision-making is promoted through the five Choosing Wisely questions (listed in Box 1) recommended for patients to use in discussions with their healthcare practitioner<sup>18</sup>.

### Box 1 Five Choosing Wisely Questions

1. Do I really need this test or procedure?
2. What are the risks?
3. Are there simpler, safer options?
4. What happens if I don't do anything?
5. What are the costs?<sup>20</sup>

Previous research about shared decision-making has largely focussed on developing and testing decision support tools<sup>19</sup>. In their systematic review, Stacey et al.<sup>6</sup> found good effectiveness of decision support tools on promoting patients' knowledge, communication between patients and practitioners, and patient satisfaction. Another systematic review found that medical practitioners endorse the use of decision support tools<sup>21</sup>. Decision support tools have also been found to challenge practice because of lack of clinician time, lack of care continuity, lack of patient knowledge, and power imbalance between patients and clinicians<sup>7 22</sup>. The decision support tools investigated in these systematic reviews were based on high quality research evidence and addressed a range of focussed health conditions<sup>6 7 19 21</sup>.

Despite the substantial quantity of research in relation to decision support tools<sup>6</sup>, limited research is available about shared decision-making and Choosing Wisely from the patient perspective. Additionally, previous studies about shared decision-making have emphasised specified health problems<sup>19</sup>. We explored patients' overall perspectives about shared decision-making in relation to any medical condition with their general practitioner (GP) with regard to using the five Choosing Wisely questions. We included patients who had been referred by their GP for a specific test, a computed tomography (CT) scan. We selected CT scans for inclusion because reductions in CT scans for nominated conditions are one

1  
2  
3 important target area of Choosing Wisely due to the risk of exposure to unnecessary  
4 radiation<sup>19</sup>.

## 6 7 8 **Research Question**

9  
10 How do patients perceive shared decision-making about CT scan referral and use of the five  
11 Choosing Wisely questions with their GP?  
12

## 13 14 15 **Methodology**

16  
17  
18 The research design was qualitative exploratory using interviews. The SRQR guidelines were  
19 used to report the study methodology<sup>23</sup>.

## 20 21 22 **Patient Involvement in Research**

23  
24  
25 Patients were not involved in the development of the research question, study design,  
26 recruitment or conduct of the study. However, the research was designed to elicit patients'  
27 perceptions.  
28

## 29 30 31 **Conceptual Framework**

32  
33  
34 The Theoretical Domains Framework (TDF) formed the conceptual framework underpinning  
35 this study. The TDF was selected because it was developed and validated from a synthesis of  
36 the 33 theories of behaviour change best suited to implementation research and practice<sup>24-26</sup>.  
37 We adopted the most recently published version of the TDF, which comprises 14-domains.  
38 The domains focus on individual motivation for behaviour and change including knowledge,  
39 beliefs, memory and decision processes, social and environmental influences, and emotion<sup>26</sup>.  
40  
41  
42  
43  
44

## 45 46 47 **Setting**

48  
49 The setting comprised a large metropolitan public healthcare network in south-eastern  
50 Australia. Following referral by their GP, patients attended the health network for an  
51 outpatient CT scan. The public healthcare network provides acute, sub-acute and outpatient  
52 services, including medical imaging, to a culturally and socio-economically diverse  
53 community. Selection of this setting was expected to maximise variation and opportunities  
54 for information about patients from different cultural and socio-economic backgrounds.  
55  
56  
57  
58  
59  
60

## Participants

Purposive sampling using maximum variation for educational background and for socio-economic status was used to select, for a semi-structured interview, up to 20 patients plus or minus carers/family. All patients were aged 18 years or older. Participants were attending the healthcare organisation for a CT scan having been referred by their GP. Where carers/family accompanied the patient, and with the patient's permission, the carer/family member was invited to participate in the interview. Carers/family were eligible to participate when they were in the role of an unpaid carer, as nominated by the patient. Participants were required to be at least 18 years of age and speak English sufficiently to provide informed consent. Where participants had a diagnosis of dementia or cognitive impairment recorded on the GP referral, they were not approached to participate.

## Data collection tools and guidelines

Data collection tools and guidelines comprised a demographic questionnaire and a semi-structured interview guide. These tools and guidelines were developed using the TDF and an earlier unpublished literature review as guides. The demographic questionnaire included questions about the participant's age, gender, country of birth, presenting health problem, educational background and employment. Interview guidelines comprised questions regarding the participant's perceptions of shared decision-making with their GP in relation to their CT scan, and their perceptions of the five Choosing Wisely patient questions. The original interview guide for the study is reported in Supplementary file 1.

## Procedure and data collection

Reception staff in the Imaging Department at the participating healthcare organisation identified participants who met the selection criteria. With the participant's permission, the researcher (JA) used the Participant Information and Consent Form (PICF) to introduce the study including the overall goal of improved understanding of patients' perceptions about shared decision-making in order to support patients' conversations with their doctors. Patients who agreed to participate were invited to nominate their informal carer to participate as well. Following an explanation of the study guided by the PICF, written consent from patients and carers was obtained. All participants were provided with a copy of the PICF. The researcher then invited the patient, and if applicable their carer, to complete the demographic questionnaire to establish their eligibility to participate in the study. The researcher invited



1  
2  
3 eligible patients and, if acceptable, their carer to participate in a face-to-face semi-structured  
4 interview in a private office at the Imaging Department after their scan, or to participate, at a  
5 later date, in a telephone interview of no more than 45 minutes duration. With permission, the  
6 semi-structured interview was audio-recorded for transcription. Interviews were conducted by  
7 the first author, a registered nurse with professional education in interviewing, at psychology  
8 Master's degree and nursing PhD level, and experience in interviewing patients and carers in  
9 both community health and research contexts. A professional transcriber transcribed the data.  
10  
11  
12  
13  
14

## 15 16 Data analysis

17  
18  
19 Demographic data were entered into Statistical Package for the Social Sciences version 21.  
20 Categorical information was analysed using frequencies. The inductive analysis technique of  
21 thematic analysis was used to analyse interview data and to make decisions about data  
22 saturation<sup>27 28</sup>. Data saturation occurs when similar codes and categories are identified across  
23 interviews with subsequent interviews identifying no new codes and categories<sup>27 28</sup>. As the  
24 number of participants required to achieve data saturation varies by research project, the  
25 research team decided to conduct an additional six interviews to confirm data saturation.  
26  
27  
28  
29  
30  
31

32 Guided by the research aim and TDF, thematic analysis involved the comparing and  
33 contrasting of codes and categories within and between interviews to identify themes and  
34 sub-themes<sup>27 28</sup>. The first author conducted the data analysis. The last author cross-coded  
35 interview transcripts. The first and last authors discussed codes, categories and themes to test  
36 the interpretation of the data and support a coherent interpretation of the interviews. All data  
37 relevant to the study are included in the article or uploaded as supplementary information.  
38  
39  
40  
41  
42

## 43 Ethics Approvals

44  
45  
46 In accordance with the Australian National Health and Medical Research Council guidelines,  
47 the Ethics Committees at the healthcare organisation and Deakin University provided ethics  
48 approvals. Patients and carers were voluntary participants in the study. Following an  
49 explanation of the study, guided by the PICF, participants provided verbal and written  
50 consent. All data were de-identified. Project identifier numbers were allocated to all  
51 qualitative information.  
52  
53  
54  
55  
56  
57  
58  
59  
60

## Findings

Twenty-two people agreed to participate. Eighteen interviews were conducted with the patient only. At two patients' requests, interviews were conducted with both the patient and the patient's carer who had accompanied them to the medical imaging department. Similar codes and categories were identified during analysis of the first 14 interviews. An additional six interviews were conducted with no new codes and categories emerging. Therefore, data saturation was considered to be achieved after 20 interviews. Most interviews (17) were conducted face-to-face at the healthcare organisation after the participant's scan. Three interviews were conducted by telephone one week after their scan.

Six participants were aged less than 50 years, nine participants were aged 50-69 years, and seven participants were aged 70 to 89 years. Fourteen participants were female and sixteen spoke English at home. Participants experienced a range of health conditions including gastrointestinal problems, respiratory conditions, cardiovascular conditions, neuropathy, and back pain. Other demographic information is presented in Supplementary File 2.

Five themes resulted from the thematic analysis:

1. Needing to know
2. Questioning doctors is not necessary
3. Discussing scans is not required
4. Uncertainty about questioning
5. Valuing the Choosing Wisely questions

### Needing to know

All participants noted that they required a CT scan because they needed to know what was wrong with them. All participants commented that their need to know what was wrong with them was the main reason for booking an appointment with their GP. According to one carer:

'I don't think there was too much to decide. She [patient] complained about the pain and the doctor wanted to do this [CT scan] to see what's going on there. She just wants to feel a bit better. She would probably have any procedure.' (P2)

The scan was important to most participants in order to plan and prepare for treatment to resolve their health problem. Three participants noted that the scan was important for their

1  
2  
3 peace of mind so that they could prepare for pain in the future and rule ‘sinister’ things out.  
4  
5 Two participants considered that the scan was important to help remove their pain. One  
6  
7 participant wanted to be sure that their infection was gone. Another participant wanted to be  
8  
9 properly diagnosed to stop people doubting that he had back problems. One patient  
10  
11 commented:

12  
13 ‘...peace of mind is the right thing, but I think it’s [the CT scan] just to know what’s going on  
14  
15 so I can prepare myself.’ (P7)

### 16 17 Questioning doctors is not necessary

18  
19  
20 Participants explained their perspectives about communicating with their doctor in the theme  
21  
22 ‘Questioning doctors is not necessary’. Many participants commented on their belief that  
23  
24 their doctors made the right decision by requesting a CT scan for the quickest assessment of  
25  
26 their illness. According to these participants, they did not have a discussion with their doctor  
27  
28 or ask questions, as this was not perceived to be necessary.

29  
30 ‘Our doctor, she’s a doctor who doesn’t want you to have unnecessary tests. We know that  
31  
32 about her because she said that. So that when she recommends a test we tend to just think,  
33  
34 yeah.’ (Patient, P6)

35  
36 According to several participants, their doctor explained radiation and reassured them about  
37  
38 the risk, therefore there was no need to ask questions. According to other participants,  
39  
40 because they had a relationship with their doctor, there was no need for discussion:

41  
42 ‘I’ve been seeing her [the GP] for a while, I haven’t had many CTs or x-rays done but I  
43  
44 vaguely remember years ago her explaining radiation and not to be too stressed about it. This  
45  
46 time ‘No’ because we’ve got an established relationship so she doesn’t really need to rehash.’  
47  
48 (Patient, P3)

49  
50 Several participants commented that they trusted their doctor and their doctor’s knowledge,  
51  
52 and complied with their doctor’s suggestions and decisions because they wished to feel  
53  
54 better. Additionally, since they trusted their doctor’s judgment and knowledge, they  
55  
56 considered that asking questions about the decision to have a CT scan was not important or  
57  
58 necessary. One patient commented:  
59  
60

1  
2  
3  
4  
5  
6  
7  
8  
9  
10  
11  
12  
13  
14  
15  
16  
17  
18  
19  
20  
21  
22  
23  
24  
25  
26  
27  
28  
29  
30  
31  
32  
33  
34  
35  
36  
37  
38  
39  
40  
41  
42  
43  
44  
45  
46  
47  
48  
49  
50  
51  
52  
53  
54  
55  
56  
57  
58  
59  
60

‘All through life you have to have x-rays. In the long run, it might cause some of your cancers. I don’t know. But I don’t think it would change me. You see people have got to keep believing in their GP. If you lose the trust. ... I wouldn’t even go to a GP. That defeats the purpose.’ (P20)

Most participants considered that people of older generations and also from some traditional family backgrounds and cultures might feel that it was disrespectful to ask their doctor any questions. Several participants commented that when a patient is in pain or very unwell they would not be well enough to ask questions.

Two participants noted that they needed to be their own advocate with their doctor and ensure that they were listened to. According to one participant, being her own advocate was important, as doctors could not know everything and could assume that patients wanted a quick answer to their problems:

‘I think you’ve got to be your own advocate. ... You have to stand up and speak for yourself, and listen. ... Because sometimes they [the doctors] don’t know better.’ (Patient, P4)

### Discussing scans is not required

In the third theme ‘Discussing scans is not required’, participants explained their perspectives about deciding to have a CT scan. Most participants commented that they did not want more discussion with their doctor, because they knew what the scan was for, understood their CT scan and experienced no anxiety. Thirteen participants noted that as they had undergone at least one CT scan in the past, they were familiar with CT scans and understood what to expect. Nine participants reported that they were satisfied with the explanation about the purpose of the CT scan they received from their doctor.

‘I understand most of what is going on a lot of the time anyway, so I don’t really need to ask a lot of questions. I do ask when I need to but this wasn’t a case that I needed to.’ (Patient, P13)

Two participants did not want to ask any questions because they perceived this would make them anxious. One participant did not ask questions, because she did not want to know details about her diagnosis. Four participants commented that they asked questions of their doctor during the consultation to clarify the need for the scan.

1  
2  
3 According to most participants, discussion about the pros and cons of their scan was not  
4 desirable because they had already received adequate information from their GP about CT  
5 scans at previous consultations and they had acquired a good understanding of the risks and  
6 benefits. Two participants noted that their doctor explained the pros and cons of their scan to  
7 them, and nine participants commented that this was not explained to them. Three  
8 participants reported their belief that they needed to have the scan done and therefore did not  
9 consider that questions about the pros and cons of the scan were necessary. One participant  
10 reflected that he should have asked about the pros and cons of his scan, however he  
11 understood that his scan was a straightforward CT scan.

12  
13 Most participants reported that as far as they were aware there were no major disadvantages  
14 of having a CT scan and the most important thing was to find out what was wrong with their  
15 health. Several participants considered that CT scans were safe. Other participants noted  
16 some disadvantages of CT scans. Four participants noted that people should not be exposed  
17 to CT scans too often due to radiation although this risk was considered minimal. Several  
18 participants reported that their doctor had informed them of this risk. According to one  
19 patient:

20  
21  
22  
23  
24  
25  
26  
27  
28  
29  
30  
31  
32  
33  
34  
35  
36  
37  
38  
39  
40  
41  
42  
43  
44  
45  
46  
47  
48  
49  
50  
51  
52  
53  
54  
55  
56  
57  
58  
59  
60  
‘Why would there be a disadvantage [of the CT scan]? ... I’ve had three CT scans in 12  
months, so I don’t find that over excessive.’ (P1)

### Uncertainty about questioning

In the theme ‘Uncertainty about questioning’, many participants expressed uncertainty and  
hesitation about the usefulness of the five Choosing Wisely questions for themselves and for  
others in decision making with their doctors. Eighteen participants commented that they had  
not seen the five Choosing Wisely questions before. Some participants reported their belief  
that patients should use the questions yet many patients do not ask their doctors questions.  
Several participants noted that the doctor would need to explain the five Choosing Wisely  
questions to patients in order for the questions to be used. Many participants commented that  
they did not need to ask their doctors the five Choosing Wisely questions due to the quality  
trusting relationship that they had with their doctor and their assumption that the doctor knew  
best. According to these participants, people without a trusting relationship with their doctor  
would need to ask questions. Other participants considered that patients would only be able to

1  
2  
3 ask questions of their doctor if they had a trusting relationship where their doctor would  
4 accept a patient asking questions.  
5

6  
7  
8 ‘I think if you have a good relationship or have trust with your doctor, your GP, I guess you  
9 just would assume that she is going to decide the right thing for you.’ (P05)  
10

11  
12 ‘It depends on the relationship that they have with their doctor. I think that if you don’t really  
13 know your doctor and you don’t trust your doctor then it [the five Choosing Wisely  
14 questions] potentially can help.’ (P07)  
15  
16

17  
18 ‘I think some people would [ask the five Choosing Wisely questions] and some people  
19 wouldn’t. Some people are very switched on and want to know things and other people still  
20 have that, well the doctor knows best. I’ll do what you tell me.’ (P10)  
21  
22

23  
24 Three participants were undecided about whether the five Choosing Wisely questions would  
25 assist a patient to weigh benefits against risks. One participant noted that he had everything  
26 explained to him and he would not need to question his doctor. However, where patients did  
27 not have a relationship with their doctor they may need to use the Choosing Wisely questions  
28 to weight up benefits against risks for themselves. One participant considered that patients  
29 would agree with the doctor and not use the questions. One participant reflected that patients  
30 might be too afraid of the answers from their doctor, in relation to risks, if they were to ask  
31 the five Choosing Wisely questions. Some people would prefer not to know and would not  
32 use the questions. According to one patient:  
33  
34  
35  
36  
37  
38  
39

40  
41 ‘It’s a scary thing to ask questions you really sometimes don’t want to hear what they’ve [the  
42 doctor] got to say.’ (P9)  
43  
44

45  
46 Six participants commented that they would not use the five Choosing Wisely questions, as  
47 they needed their scan in order to recover their health. Several other participants commented  
48 that they would never opt to do nothing and therefore they would not ask their doctor the  
49 Choosing Wisely question ‘What happens if I don’t do anything?’ According to two  
50 participants, doctors may not want patients to ask them questions. Further, it was perceived  
51 that some patients may not want to ask their doctors questions since they may feel that  
52 questioning the doctor is too confrontational. One patient noted:  
53  
54  
55  
56  
57  
58  
59  
60

1  
2  
3 ‘Do I really need this test or procedure? I think it’s almost questioning the doctor. I think  
4 there is potential for some doctors to have their nose out of joint’. (P7)  
5  
6  
7

### 8 Valuing the Choosing Wisely questions 9

10 All participants were invited to discuss the value of the questions. However, only fourteen  
11 participants commented. These participants expressed a range of views about the value of the  
12 questions. Several participants considered the questions were valuable because they guided  
13 patients to reflect on decisions with their doctor and to take greater responsibility for their  
14 healthcare decisions. One carer participant reported their belief that some people did have  
15 unnecessary tests and procedures and that there may be associated risks that were not  
16 considered. According to this carer, some people thought that an x-ray test was just like  
17 taking a photograph with no risks and therefore the Choosing Wisely questions could be  
18 valuable in prompting patients to consider risks with their doctors. Another participant further  
19 explained that during a consultation with a doctor, patients were more concerned with what  
20 they thought that they needed. According to this participant, the questions would prompt a  
21 patient to consider additional priorities such as are there safer or cheaper options. Two  
22 participants reported that the questions would be valuable because they would increase the  
23 information available to patients, which would be reassuring for patients in making decisions  
24 with their doctors. Another two participants noted that the questions would be valuable as a  
25 memory prompt for patients. According to one patient:  
26  
27  
28  
29  
30  
31  
32  
33  
34  
35  
36  
37  
38

39 ‘I think it [the five Choosing Wisely questions] might jolt a person’s memory. It might  
40 engage the patient on a different level. You know outside their paradigm of thinking. So it’s a  
41 bit like a safety map. (P18)  
42  
43  
44

45 Some participants commented that the five Choosing Wisely questions were valuable because  
46 availability of the questions would give patients permission to ask questions of their doctors.  
47 According to one participant, some people believed that they were not permitted to ask their  
48 doctors questions and needed to know that asking doctors questions was acceptable. Several  
49 participants noted that the questions would need to be brought to patients’ attention by  
50 doctors to signal to patients that it was acceptable to ask questions.  
51  
52  
53  
54  
55

56 ‘I think ... some patients need to have that so that they’re given permission in their minds to  
57 ask those questions.’ (P06)  
58  
59  
60

1  
2  
3 ‘Some people just do what they’re told. But if there was a set of questions then they would  
4 know to ask wouldn’t they?’ (P21)  
5  
6

7  
8 Additionally, participants commented on a range of facilitators and barriers to using the five  
9 Choosing Wisely questions. These are listed in Supplementary File 3. Several participants  
10 reported that they did not find the Choosing Wisely question regarding costs was valuable as  
11 they considered that it was not applicable to the publicly funded Australian health setting.  
12  
13 Two participants asked if the Choosing Wisely question pertaining to costs reflected  
14 monetary costs or human costs.  
15  
16  
17

## 18 19 **Discussion**

20  
21 Findings indicate that participants presented to their GP with a health problem that they  
22 needed to understand and address. Participants accepted their GPs decision to prescribe a CT  
23 scan to identify the nature of the problem. Participants reported ambivalence about using the  
24 five Choosing Wisely questions with their doctor; although, many participants reported  
25 valuing these questions. Few past studies have examined using the five Choosing Wisely  
26 questions from the patient perspective<sup>17 18</sup>. Findings from the current study contribute  
27 knowledge about patients’ use of questions in healthcare contexts of de-implementation of  
28 low value care.  
29  
30  
31  
32  
33  
34  
35

36  
37 Previous research about shared decision-making has found decision support tools with clearly  
38 articulated decision choices are effective<sup>6 19 21</sup>. Asking questions, such as use of the five  
39 Choosing wisely questions, is one part of shared decision-making<sup>1 9</sup>. However, in the current  
40 study, findings indicate that all participants perceived that they required a solution to their  
41 health problem in the form of an investigatory intervention. Although many participants  
42 understood the value of Choosing Wisely in terms of healthcare stewardship, when the  
43 decision was about their own health directly, they expected their doctor to order all medical  
44 tests. Most participants expected that their GP would make this decision and that the tests  
45 would be beneficial. These findings are aligned with previous research that patients  
46 overestimate the benefits and underestimate the harms of medical interventions<sup>8 18</sup>.  
47  
48

49  
50 Implementation of the five Choosing Wisely questions into practice is complicated by  
51 patients’ beliefs, attitudes, knowledge and emotions<sup>26</sup>. Although the Choosing Wisely  
52 literature emphasises the need to change patients’ expectations<sup>4 18</sup> few studies have examined  
53 implementation facilitators and barriers from patients’ perspectives. The current study  
54  
55  
56  
57  
58  
59  
60



1  
2  
3 highlights the role of patients' motivation in using the five Choosing Wisely questions and  
4 de-implementation of low value care.  
5  
6

7  
8 Our findings also indicate a lack of consumer and patient awareness of the five questions.  
9 This is reflective of the emphasis to date of the Choosing Wisely campaign upon  
10 disinvestment by health practitioners and healthcare organisations in low value care, without  
11 similar efforts being made to educate patients and consumers about how to engage in shared  
12 decision-making by using the five questions.  
13  
14  
15

16  
17 Some participants commented on the value of the five Choosing Wisely questions as a signal  
18 that patients were permitted to ask questions of their doctor. The availability and application  
19 of communication tools such as the five Choosing Wisely questions may assist patients in  
20 addressing their lack of knowledge and the power imbalance between patients and clinicians.  
21 Although this may improve shared decision-making in de-implementation of low value care,  
22 support for general practitioners to engage and educate patients about using the five Choosing  
23 Wisely questions is needed. This may require a focus on giving patients permission to ask  
24 their doctors questions about the benefits of a watch and wait approach.  
25  
26  
27  
28  
29  
30

### 31 32 Further research

33  
34 The five Choosing Wisely questions are a communication rather than a decision support tool.  
35 Research about decision support tools inclusive of communication guides and de-  
36 implementation in primary care contexts is warranted with focus on understanding patient  
37 motivation and also on empowering patients to ask questions and engage in shared decision  
38 making. Research with larger representative samples to ascertain patients' perspectives would  
39 add knowledge at population levels. Further research is required in regard to the  
40 implementation of the five Choosing Wisely questions in defined populations with potentially  
41 different motivation for shared decision-making such as people living with chronic illness  
42 engaged in self-management.  
43  
44  
45  
46  
47  
48  
49

### 50 51 Study strengths and limitations

52  
53 This was a qualitative study using purposive sampling and no claims can be made that  
54 generalise findings to populations. The participants in the current study were all referred for  
55 and attended a CT scan and nothing is known about use of the five Choosing Wisely  
56 questions among patients who were not referred for a CT scan. Many participants had  
57  
58  
59  
60

1  
2  
3 experienced a previous CT scan and this may have limited their perceived need to question  
4 their doctor. The timing of the interview after the CT scan may have predisposed participants  
5 to assume that the test was beneficial. Additionally, three interviews were conducted one  
6 week after their scan and this may have affected recall bias. We argue, however, that findings  
7 from the current study may have application to similar contexts of care elsewhere. The study  
8 included a small sample using semi-structured interviews. This enabled a detailed descriptive  
9 exploration of participant's attitudes, beliefs and knowledge, and identification of factors and  
10 processes facilitating and constraining patients' use of the Choosing Wisely questions.  
11  
12  
13  
14  
15  
16

## 17 **Conclusions and Implications for Practice**

18  
19  
20  
21 Shared decision-making is a principle underpinning Choosing Wisely. This ideal may not be  
22 matched in practice where patients seek a solution from an authoritative expert clinician such  
23 as a medical practitioner. Patients may require education that they are permitted to ask  
24 questions of their medical practitioner. Patients' motivation to engage in shared decision-  
25 making requires clinicians' understanding of patients' attitudes, beliefs, knowledge and  
26 emotions. Systems support and education for healthcare practitioners in effective  
27 communication is essential. However, this needs to emphasise communication with patients  
28 with varying motivation to engage in shared decision-making. Skilful application with  
29 patients of available communication tools, such as the five Choosing Wisely questions, and  
30 paid clinician time to undertake this important healthcare practice, are imperative to future  
31 success in implementation of Choosing Wisely.  
32  
33  
34  
35  
36  
37  
38  
39  
40

### 41 **Data availability**

42  
43 All data relevant to the study are included in the article or uploaded as supplementary  
44 information.  
45  
46  
47

## 48 **References**

- 49  
50  
51 1. Wolfson D, Santa J, Slass L. Engaging physicians and consumers in conversations about  
52 treatment overuse and waste: a short history of the choosing wisely campaign.  
53 *Academic Medicine: Journal Of The Association Of American Medical Colleges*  
54 2014;89(7):990-95. doi: 10.1097/ACM.0000000000000270  
55  
56  
57 2. Greene SE, Massone R. A survey of emergency medicine residents' perspectives of the  
58 choosing wisely campaign. Philadelphia, Pennsylvania: Elsevier B.V., 2015:853-55.  
59  
60

- 1  
2  
3 3. Zikmund-Fisher B, Kullgren J, Fagerlin A, et al. Perceived Barriers to Implementing  
4 Individual Choosing Wisely® Recommendations in Two National Surveys of Primary  
5 Care Providers. *JGIM: Journal of General Internal Medicine* 2017;32(2):210-17. doi:  
6 10.1007/s11606-016-3853-5  
7
- 8  
9 4. Schlesinger M, Grob R. Treating, Fast and Slow: Americans' Understanding of and  
10 Responses to Low-Value Care. *Milbank Quarterly* 2017;95(1):70-116. doi:  
11 10.1111/1468-0009.12246  
12
- 13 5. Levinson W, Kallewaard M, Bhatia RS, et al. 'Choosing Wisely': a growing international  
14 campaign. *BMJ Quality & Safety* 2015;24(2):167-74. doi: 10.1136/bmjqs-2014-  
15 003821  
16
- 17 6. Stacey D, Legare F, Lewis KB, et al. Decision aids to help people who are facing health  
18 treatment or screening decisions. *Cochrane Database of Systematic Reviews* 2017 doi:  
19 DOI: 10.1002/14651858.CD001431.pub5  
20  
21
- 22 7. Joseph-Williams N, Elwyn G, Edwards AG. Knowledge is not power for patients: a  
23 systematic review and thematic synthesis of patient-reported barriers and facilitators  
24 to shared decision making. *Patient Education & Counseling* 2014;94(3):291-309.  
25
- 26 8. Hoffmann T, Del Mar C. Patients' expectations of the benefits and harms of treatments,  
27 screening, and tests: A systematic review. *Journal of the American Medical*  
28 *Association* 2015;175:274-86.  
29  
30
- 31 9. Choosing Wisely. Choosing Wisely: A Special Report on the first five years USA2019  
32 [Available from: [http://www.choosingwisely.org/wp-](http://www.choosingwisely.org/wp-content/uploads/2017/10/Choosing-Wisely-at-Five.pdf)  
33 [content/uploads/2017/10/Choosing-Wisely-at-Five.pdf](http://www.choosingwisely.org/wp-content/uploads/2017/10/Choosing-Wisely-at-Five.pdf).  
34  
35
- 36 10. Hahn C, Kavanagh B, Bhatnagar A, et al. Choosing wisely: The American Society for  
37 radiation oncology's top 5 list. *Practical Radiation Oncology* 2014;4(6):349-55.  
38
- 39 11. Lusiani L, Frediani R, Nardi R, et al. Doing more does not mean doing better: The  
40 FACOI contribution to the slow medicine program for a sustainable and wise  
41 healthcare system. *Italian Journal of Medicine* 2015;9(3):281-86.  
42
- 43 12. Simos D, Hutton B, Clemons M. Are Physicians Choosing Wisely When Imaging for  
44 Distant Metastases in Women With Operable Breast Cancer? *Journal of Oncology*  
45 *Practice* 2015;11(1):62-68. doi: 10.1200/JOP.2014.000125  
46  
47
- 48 13. Figar S, Finakly S, Wong CJ, et al. Retrospective audit of plain film imaging in acute  
49 ankle trauma: Are we choosing wisely? *Journal of Medical Imaging and Radiation*  
50 *Oncology* 2017;61:149-50.  
51
- 52 14. Hair H, Boudreau D, Rice C, et al. A patient focused information design intervention to  
53 support the mTBI Choosing Wisely recommendation. *Canadian Journal of*  
54 *Emergency Medicine* 2017;19:S71.  
55
- 56 15. Lin MP, Nguyen T, Probst MA, et al. Emergency Physician Knowledge, Attitudes, and  
57 Behavior Regarding ACEP's Choosing Wisely Recommendations: A Survey Study.  
58 *Academic Emergency Medicine* 2017;24(6):668-75. doi: 10.1111/acem.13167  
59  
60

16. Gieniusz M, Kozikowski A, Williams M, et al. Peg tubes in patients with advanced dementia: Are we 'choosing wisely?'. *Journal of the American Geriatrics Society* 2017;65:S77.
17. Silverstein W, Lass E, Born KB, et al. A survey of primary care patients' readiness to engage in the de-adoption practices recommended by Choosing Wisely Canada. *BMC Research Notes* 2016;9:301-8.
18. NPS MedicineWise. Choosing Wisely Australia 2017 report. Canberra: Choosing Wisely Australia, 2017.
19. Clifford AM, Ryan J, Walsh C, et al. What information is used in treatment decision aids? A systematic review of the types of evidence populating health decision aids. *BMC Medical Informatics & Decision Making* 2017;17:1-15. doi: 10.1186/s12911-017-0415-7
20. Choosing Wisely Australia. 5 questions to ask your doctor or other healthcare provider 2019 [Available from: <http://www.choosingwisely.org.au/resources/consumers/5-questions-to-ask-your-doctor>].
21. Pollard S, Bansback N, Bryan S. Physician attitudes toward shared decision making: A systematic review. *Patient Education & Counseling* 2015;98(9):1046-57. doi: 10.1016/j.pec.2015.05.004
22. Elwyn G, Scholl I, Tietbohl C, et al. 'Many miles to go ...': a systematic review of the implementation of patient decision support interventions into routine clinical practice. *BMC Medical Informatics & Decision Making* 2013;13:S14-S14. doi: 10.1186/1472-6947-13-S2-S14
23. O'Brien B, Harris I, Beckman T, et al. Standards for reporting qualitative research: A synthesis of recommendations. *Academic Medicine: Journal Of The Association Of American Medical Colleges* 2014;89(9):1245-51.
24. Cane J, O'Connor D, Michie S. Validation of the theoretical domains framework for use in behaviour change and implementation research. *Implementation Science* 2012;7:37-53. doi: 10.1186/1748-5908-7-37
25. Michie S, Johnson M, Abraham C, et al. Making psychological theory useful for implementing evidence based practice: a consensus approach. *Quality and Safety in HealthCare* 2005;14:26-33.
26. Atkins L, Francis J, Islam R, et al. A guide to using the Theoretical Domains Framework of behaviour change to investigate implementation problems. *Implementation Science* 2017;12:77. doi: <https://doi.org/10.1186/s13012-017-0605-9>
27. Spencer L, Ritchie J, Ormston R, et al. Analysis principles and processes. In: Ritchie J, Lewis j, McNaughton Nicholls C, et al., eds. *Qualitative Research Practice: A Guide for Social Science Students & Researchers*. London: Sage 2014:269-95.
28. Spencer L, Ritchie J, O'Connor W, et al. Analysis in practice. In: Ritchie J, Lewis C, McNaughton Nicholls C, et al., eds. *Qualitative Research Practice: A Guide for Social Science Students & Researchers*. London: Sage 2014:295-347.

## Supplementary File 1: Interview Guide

You are being asked to participate in this research project because we would like to know your views with respect to the use of some questions. These questions are recommended for use by patients in conversation with their general practitioner when deciding to have a CT scan. The recommended questions are:

1. Do I really need this test or procedure?
2. What are the risks?
3. Are there simpler, safer options?
4. What happens if I don't do anything?
5. What are the costs?

The interview should take approximately 30-45 minutes and with your permission it will be digitally-recorded to ensure that all key points are accurately documented. Any identifying information (for example the names of other individuals) that you use in the course of our discussion will be removed from the interview transcripts. If you wish to end the interview before I have asked all of the questions or if you wish to withdraw from the study you are free to do so.

There may appear to be overlap between the interview questions that form part of the interview. Each question is worded to obtain specific information and so you may find that answers are repeated. It is important to note that there are no right or wrong answers to the questions and that no one will know what your specific answers were.

Note to the Interviewer: Depending on how the participant answers the questions, the order in which these questions are asked can change.

### Questions

1. Tell me about your visit to medical imaging?

Prompts:

What test are you having?

What are you having the test for?

What is the most important thing about having the test?

What are the disadvantages of having the test?)

2. Tell me about the decision to have the test?

Prompts:

Did you have a discussion/ask about it as an option with your doctor?

What was important in the discussion?

What questions did you ask?

What was missing in the discussion? i.e. was there information that you desired, but did not receive?

3. Was the reason/pros and cons for having the test explained to you?

Prompts:

What were the benefits of having the test done?

What were the negative aspects of having the test done?

Did you feel you had an option to choose (or choose not) to have the test done?

- 1  
2  
3           ○ How did you come to your decision?  
4 4. Did deciding to have the test cause you anxiety or stress? If yes, can you explain?  
5           Alternative to Question 4:  
6

7           What feelings or emotions did you feel when deciding to have the test?  
8

- 9 5. Do you know other patient(s) who have had the test done?  
10           Prompts:  
11           Did this influence your opinion of the test? (“Good or bad” to have it done?)  
12 6. Have you heard of the following five questions that you can use to find out information  
13 from your doctor about your test?  
14  
15

16 (Instructions for interviewer: Provide patient with printed list of the following questions)

- 17 1. Do I really need this test or procedure?  
18 2. What are the risks?  
19 3. Are there simpler, safer options?  
20 4. What happens if I don't do anything?  
21 5. What are the costs?  
22 7. If patients new about these questions, do you think they would ask the questions of their  
23 doctors?  
24           Prompts:  
25           What would help them to ask?  
26           What would stop them asking these questions?  
27  
28 8. Do you think the five questions would help patients to weigh up the benefits compared to  
29 the risks of having the test?  
30           Prompts:  
31           If so, how would the questions help?  
32           If not, can you tell me more about why?  
33  
34 9. Do you have any suggestions for how to inform patients about these questions? If so, what  
35 are your suggestions?  
36  
37  
38  
39  
40  
41  
42  
43  
44  
45  
46  
47  
48  
49  
50  
51  
52  
53  
54  
55  
56  
57  
58  
59  
60

**Supplementary File 2. Demographic Characteristics of Participants (N=22)**

| Demographic information                   | Frequency (%) |
|-------------------------------------------|---------------|
| Country of birth                          |               |
| Australia/NZ                              | 13 (59.1)     |
| United Kingdom                            | 3 (13.6)      |
| Hungary                                   | 2 (9.1)       |
| China                                     | 2 (9.1)       |
| South Africa                              | 1 (4.5)       |
| Netherlands                               | 1 (4.5)       |
| Completed secondary school education      |               |
| Year 12                                   | 9 (30.0)      |
| Year 11                                   | 6 (20.0)      |
| Year 10                                   | 4 (13.3)      |
| Less than year 9                          | 3 (10.0)      |
| Completed post secondary school education |               |
| University degree                         | 6 (27.3)      |
| Vocational Education and Training         | 8 (26.7)      |
| Nil                                       | 8 (26.7)      |
| Occupation                                |               |
| Registered nurse/Enrolled nurse           | 3 (13.6)      |
| Housekeeper/cook                          | 3 (13.6)      |
| Teacher                                   | 2 (9.1)       |
| Home duties                               | 2 (9.1)       |
| Manager/accounting                        | 2 (9.1)       |
| Unemployed                                | 2 (9.1)       |
| Other                                     | 8 (36.4)      |

---

**Income source**

|                                    |          |
|------------------------------------|----------|
| Employed                           | 8 (36.4) |
| Self-funded retirement             | 3 (13.6) |
| Unemployment or disability benefit | 3 (13.6) |
| Old age pension/veterans' pension  | 8 (36.4) |

**Retired**

|     |           |
|-----|-----------|
| Yes | 11 (50.0) |
| No  | 11 (50.0) |

---



## Supplementary File 3: Facilitators and Barriers to using the Five Choosing Wisely Questions

---

### Facilitators and barriers

---

#### Facilitators

##### **A good relationship with the doctor**

A doctor who can explain things

Doctors who are patient friendly

Doctors who have empathy

##### **Availability in different languages**

Five Choosing Wisely questions need to be available in different languages

##### **Advertise the questions**

Advertise the five Choosing Wisely questions (TV, Social Media, Presentations)

Make information available on the clinic/health service website – Do you know your rights? Do you know that you can ask questions?

##### **Educate patients that they are allowed to ask questions**

Assist patients to know about the five Choosing Wisely questions

Make the questions available in the GP clinic and reception area ‘These are your rights?’/‘Did you know that you can ask these questions’

Posters

Questions available on the table in the waiting room

GP to hand patient a card/pamphlet containing the questions and explain the questions

##### **Format and title of the questions**

Title of the questions ‘Being better informed, questions to help your care’

Ensure an official logo is on the questions to show that they are endorsed by doctors

Questions need to be in bold so that people can read them

#### Barriers

##### **Doctors who are not approachable**

Limited GP time

Doctors are in a rush

Doctors are encouraged to have very short consultations with their patients

Doctors who are intimidating or not approachable

---

**Fear and embarrassment**

Fear of asking the questions

Fear of the answer to the questions

Fear of asking the questions the wrong way (CALD patients)

Embarrassing to ask questions because don't know how to ask (CALD patients)

Some people may not be comfortable with the word 'risk'

Fear of offending the doctor, appearing to question the doctor's knowledge

**Too unwell to ask questions**

Too unwell or overwhelmed with the medical problem to ask questions

People experiencing pain

**Lack of awareness of the need for questions**

Lack of awareness of the need to ask questions

The patient thought they knew the answers already (by using the internet, previous experience of a CT scan)

**Patients who do not speak English**

People who do not speak or read English will not be able to use the questions

---

# Reporting checklist for qualitative study.

Based on the SRQR guidelines.

## Instructions to authors

Complete this checklist by entering the page numbers from your manuscript where readers will find each of the items listed below.

Your article may not currently address all the items on the checklist. Please modify your text to include the missing information. If you are certain that an item does not apply, please write "n/a" and provide a short explanation.

Upload your completed checklist as an extra file when you submit to a journal.

In your methods section, say that you used the SRQR reporting guidelines, and cite them as:

O'Brien BC, Harris IB, Beckman TJ, Reed DA, Cook DA. Standards for reporting qualitative research: a synthesis of recommendations. Acad Med. 2014;89(9):1245-1251.

|                 | Reporting Item                                                                                                                                                                                                                                                 | Page Number |
|-----------------|----------------------------------------------------------------------------------------------------------------------------------------------------------------------------------------------------------------------------------------------------------------|-------------|
| <b>Title</b>    | <p><a href="#">#1</a> Concise description of the nature and topic of the study identifying the study as qualitative or indicating the approach (e.g. ethnography, grounded theory) or data collection methods (e.g. interview, focus group) is recommended</p> | Title page  |
| <b>Abstract</b> |                                                                                                                                                                                                                                                                |             |

|    |                       |                    |                                                        |     |
|----|-----------------------|--------------------|--------------------------------------------------------|-----|
| 1  |                       | <a href="#">#2</a> | Summary of the key elements of the study               | 2   |
| 2  |                       |                    |                                                        |     |
| 3  |                       |                    |                                                        |     |
| 4  |                       |                    | using the abstract format of the intended              |     |
| 5  |                       |                    |                                                        |     |
| 6  |                       |                    | publication; typically includes background,            |     |
| 7  |                       |                    |                                                        |     |
| 8  |                       |                    | purpose, methods, results and conclusions              |     |
| 9  |                       |                    |                                                        |     |
| 10 |                       |                    |                                                        |     |
| 11 | <b>Introduction</b>   |                    |                                                        |     |
| 12 |                       |                    |                                                        |     |
| 13 |                       |                    |                                                        |     |
| 14 | Problem formulation   | <a href="#">#3</a> | Description and significance of the problem /          | 4-6 |
| 15 |                       |                    |                                                        |     |
| 16 |                       |                    | phenomenon studied: review of relevant theory          |     |
| 17 |                       |                    |                                                        |     |
| 18 |                       |                    | and empirical work; problem statement                  |     |
| 19 |                       |                    |                                                        |     |
| 20 |                       |                    |                                                        |     |
| 21 |                       |                    |                                                        |     |
| 22 | Purpose or research   | <a href="#">#4</a> | Purpose of the study and specific objectives or        | 6   |
| 23 |                       |                    |                                                        |     |
| 24 | question              |                    | questions                                              |     |
| 25 |                       |                    |                                                        |     |
| 26 |                       |                    |                                                        |     |
| 27 | <b>Methods</b>        |                    |                                                        |     |
| 28 |                       |                    |                                                        |     |
| 29 |                       |                    |                                                        |     |
| 30 | Qualitative approach  | <a href="#">#5</a> | Qualitative approach (e.g. ethnography,                | 6   |
| 31 |                       |                    |                                                        |     |
| 32 | and research paradigm |                    | grounded theory, case study, phenomenology,            |     |
| 33 |                       |                    |                                                        |     |
| 34 |                       |                    | narrative research) and guiding theory if              |     |
| 35 |                       |                    |                                                        |     |
| 36 |                       |                    | appropriate; identifying the research paradigm         |     |
| 37 |                       |                    |                                                        |     |
| 38 |                       |                    | (e.g. postpositivist, constructivist / interpretivist) |     |
| 39 |                       |                    |                                                        |     |
| 40 |                       |                    | is also recommended; rationale. The rationale          |     |
| 41 |                       |                    |                                                        |     |
| 42 |                       |                    | should briefly discuss the justification for           |     |
| 43 |                       |                    |                                                        |     |
| 44 |                       |                    | choosing that theory, approach, method or              |     |
| 45 |                       |                    |                                                        |     |
| 46 |                       |                    | technique rather than other options available;         |     |
| 47 |                       |                    |                                                        |     |
| 48 |                       |                    | the assumptions and limitations implicit in            |     |
| 49 |                       |                    |                                                        |     |
| 50 |                       |                    | those choices and how those choices influence          |     |
| 51 |                       |                    |                                                        |     |
| 52 |                       |                    | study conclusions and transferability. As              |     |
| 53 |                       |                    |                                                        |     |
| 54 |                       |                    |                                                        |     |
| 55 |                       |                    |                                                        |     |
| 56 |                       |                    |                                                        |     |
| 57 |                       |                    |                                                        |     |
| 58 |                       |                    |                                                        |     |
| 59 |                       |                    |                                                        |     |
| 60 |                       |                    |                                                        |     |

appropriate the rationale for several items

might be discussed together.

|    |                     |                     |     |
|----|---------------------|---------------------|-----|
| 1  |                     |                     |     |
| 2  |                     |                     |     |
| 3  |                     |                     |     |
| 4  |                     |                     |     |
| 5  |                     |                     |     |
| 6  | Researcher          | <a href="#">#6</a>  | 8   |
| 7  |                     |                     |     |
| 8  | characteristics and |                     |     |
| 9  |                     |                     |     |
| 10 | reflexivity         |                     |     |
| 11 |                     |                     |     |
| 12 |                     |                     |     |
| 13 |                     |                     |     |
| 14 |                     |                     |     |
| 15 |                     |                     |     |
| 16 |                     |                     |     |
| 17 |                     |                     |     |
| 18 |                     |                     |     |
| 19 |                     |                     |     |
| 20 |                     |                     |     |
| 21 |                     |                     |     |
| 22 |                     |                     |     |
| 23 |                     |                     |     |
| 24 |                     |                     |     |
| 25 | Context             | <a href="#">#7</a>  | 6   |
| 26 |                     |                     |     |
| 27 |                     |                     |     |
| 28 |                     |                     |     |
| 29 |                     |                     |     |
| 30 | Sampling strategy   | <a href="#">#8</a>  | 7   |
| 31 |                     |                     |     |
| 32 |                     |                     |     |
| 33 |                     |                     |     |
| 34 |                     |                     |     |
| 35 |                     |                     |     |
| 36 |                     |                     |     |
| 37 |                     |                     |     |
| 38 |                     |                     |     |
| 39 |                     |                     |     |
| 40 | Ethical issues      | <a href="#">#9</a>  | 8   |
| 41 |                     |                     |     |
| 42 | pertaining to human |                     |     |
| 43 |                     |                     |     |
| 44 | subjects            |                     |     |
| 45 |                     |                     |     |
| 46 |                     |                     |     |
| 47 |                     |                     |     |
| 48 |                     |                     |     |
| 49 |                     |                     |     |
| 50 | Data collection     | <a href="#">#10</a> | 7-8 |
| 51 |                     |                     |     |
| 52 | methods             |                     |     |
| 53 |                     |                     |     |
| 54 |                     |                     |     |
| 55 |                     |                     |     |
| 56 |                     |                     |     |
| 57 |                     |                     |     |
| 58 |                     |                     |     |
| 59 |                     |                     |     |
| 60 |                     |                     |     |

|    |                 |                                                                |                    |
|----|-----------------|----------------------------------------------------------------|--------------------|
| 1  |                 | triangulation of sources / methods, and                        |                    |
| 2  |                 |                                                                |                    |
| 3  |                 | modification of procedures in response to                      |                    |
| 4  |                 |                                                                |                    |
| 5  |                 | evolving study findings; rationale                             |                    |
| 6  |                 |                                                                |                    |
| 7  |                 |                                                                |                    |
| 8  | Data collection | <a href="#">#11</a> Description of instruments (e.g. interview | 7, Supplementary   |
| 9  |                 |                                                                |                    |
| 10 | instruments and | guides, questionnaires) and devices (e.g. audio                | file 1             |
| 11 |                 |                                                                |                    |
| 12 | technologies    | recorders) used for data collection; if / how the              |                    |
| 13 |                 |                                                                |                    |
| 14 |                 | instruments(s) changed over the course of the                  |                    |
| 15 |                 |                                                                |                    |
| 16 |                 | study                                                          |                    |
| 17 |                 |                                                                |                    |
| 18 |                 |                                                                |                    |
| 19 |                 |                                                                |                    |
| 20 | Units of study  | <a href="#">#12</a> Number and relevant characteristics of     | 8-9,               |
| 21 |                 |                                                                |                    |
| 22 |                 | participants, documents, or events included in                 | Supplementary file |
| 23 |                 |                                                                |                    |
| 24 |                 | the study; level of participation (could be                    | 2                  |
| 25 |                 |                                                                |                    |
| 26 |                 | reported in results)                                           |                    |
| 27 |                 |                                                                |                    |
| 28 |                 |                                                                |                    |
| 29 |                 |                                                                |                    |
| 30 | Data processing | <a href="#">#13</a> Methods for processing data prior to and   | 7-8                |
| 31 |                 |                                                                |                    |
| 32 |                 | during analysis, including transcription, data                 |                    |
| 33 |                 |                                                                |                    |
| 34 |                 | entry, data management and security,                           |                    |
| 35 |                 |                                                                |                    |
| 36 |                 | verification of data integrity, data coding, and               |                    |
| 37 |                 |                                                                |                    |
| 38 |                 | anonymisation / deidentification of excerpts                   |                    |
| 39 |                 |                                                                |                    |
| 40 |                 |                                                                |                    |
| 41 |                 |                                                                |                    |
| 42 | Data analysis   | <a href="#">#14</a> Process by which inferences, themes, etc.  | 8                  |
| 43 |                 |                                                                |                    |
| 44 |                 | were identified and developed, including the                   |                    |
| 45 |                 |                                                                |                    |
| 46 |                 | researchers involved in data analysis; usually                 |                    |
| 47 |                 |                                                                |                    |
| 48 |                 | references a specific paradigm or approach;                    |                    |
| 49 |                 |                                                                |                    |
| 50 |                 | rationale                                                      |                    |
| 51 |                 |                                                                |                    |
| 52 |                 |                                                                |                    |
| 53 |                 |                                                                |                    |
| 54 |                 |                                                                |                    |
| 55 |                 |                                                                |                    |
| 56 |                 |                                                                |                    |
| 57 |                 |                                                                |                    |
| 58 |                 |                                                                |                    |
| 59 |                 |                                                                |                    |
| 60 |                 |                                                                |                    |

|    |                         |                     |                                                   |       |
|----|-------------------------|---------------------|---------------------------------------------------|-------|
| 1  | Techniques to enhance   | <a href="#">#15</a> | Techniques to enhance trustworthiness and         | 8     |
| 2  |                         |                     |                                                   |       |
| 3  | trustworthiness         |                     | credibility of data analysis (e.g. member         |       |
| 4  |                         |                     | checking, audit trail, triangulation); rationale  |       |
| 5  |                         |                     |                                                   |       |
| 6  |                         |                     |                                                   |       |
| 7  |                         |                     |                                                   |       |
| 8  |                         |                     |                                                   |       |
| 9  | <b>Results/findings</b> |                     |                                                   |       |
| 10 |                         |                     |                                                   |       |
| 11 |                         |                     |                                                   |       |
| 12 | Syntheses and           | <a href="#">#16</a> | Main findings (e.g. interpretations, inferences,  | 8-13  |
| 13 |                         |                     |                                                   |       |
| 14 | interpretation          |                     | and themes); might include development of a       |       |
| 15 |                         |                     | theory or model, or integration with prior        |       |
| 16 |                         |                     | research or theory                                |       |
| 17 |                         |                     |                                                   |       |
| 18 |                         |                     |                                                   |       |
| 19 |                         |                     |                                                   |       |
| 20 |                         |                     |                                                   |       |
| 21 |                         |                     |                                                   |       |
| 22 | Links to empirical data | <a href="#">#17</a> | Evidence (e.g. quotes, field notes, text          | 8-13  |
| 23 |                         |                     |                                                   |       |
| 24 |                         |                     | excerpts, photographs) to substantiate analytic   |       |
| 25 |                         |                     | findings                                          |       |
| 26 |                         |                     |                                                   |       |
| 27 |                         |                     |                                                   |       |
| 28 |                         |                     |                                                   |       |
| 29 | <b>Discussion</b>       |                     |                                                   |       |
| 30 |                         |                     |                                                   |       |
| 31 |                         |                     |                                                   |       |
| 32 |                         |                     |                                                   |       |
| 33 | Intergration with prior | <a href="#">#18</a> | Short summary of main findings; explanation of    | 13-14 |
| 34 |                         |                     |                                                   |       |
| 35 | work, implications,     |                     | how findings and conclusions connect to,          |       |
| 36 |                         |                     | support, elaborate on, or challenge conclusions   |       |
| 37 | transferability and     |                     | of earlier scholarship; discussion of scope of    |       |
| 38 |                         |                     | application / generalizability; identification of |       |
| 39 | contribution(s) to the  |                     | unique contributions(s) to scholarship in a       |       |
| 40 |                         |                     | discipline or field                               |       |
| 41 | field                   |                     |                                                   |       |
| 42 |                         |                     |                                                   |       |
| 43 |                         |                     |                                                   |       |
| 44 |                         |                     |                                                   |       |
| 45 |                         |                     |                                                   |       |
| 46 |                         |                     |                                                   |       |
| 47 |                         |                     |                                                   |       |
| 48 |                         |                     |                                                   |       |
| 49 | Limitations             | <a href="#">#19</a> | Trustworthiness and limitations of findings       | 15    |
| 50 |                         |                     |                                                   |       |
| 51 |                         |                     |                                                   |       |
| 52 | <b>Other</b>            |                     |                                                   |       |
| 53 |                         |                     |                                                   |       |
| 54 |                         |                     |                                                   |       |
| 55 |                         |                     |                                                   |       |
| 56 |                         |                     |                                                   |       |
| 57 |                         |                     |                                                   |       |
| 58 |                         |                     |                                                   |       |
| 59 |                         |                     |                                                   |       |
| 60 |                         |                     |                                                   |       |

|    |                       |                     |                                                |                    |
|----|-----------------------|---------------------|------------------------------------------------|--------------------|
| 1  | Conflicts of interest | <a href="#">#20</a> | Potential sources of influence of perceived    | The authors report |
| 2  |                       |                     |                                                |                    |
| 3  |                       |                     |                                                |                    |
| 4  |                       |                     | influence on study conduct and conclusions;    | no conflict of     |
| 5  |                       |                     |                                                |                    |
| 6  |                       |                     | how these were managed                         | interest, page 3   |
| 7  |                       |                     |                                                |                    |
| 8  |                       |                     |                                                |                    |
| 9  | Funding               | <a href="#">#21</a> | Sources of funding and other support; role of  | 3                  |
| 10 |                       |                     |                                                |                    |
| 11 |                       |                     | funders in data collection, interpretation and |                    |
| 12 |                       |                     |                                                |                    |
| 13 |                       |                     | reporting                                      |                    |
| 14 |                       |                     |                                                |                    |
| 15 |                       |                     |                                                |                    |

16 None The SRQR checklist is distributed with permission of Wolters Kluwer © 2014 by the Association  
17 of American Medical Colleges. This checklist can be completed online using  
18  
19 <https://www.goodreports.org/>, a tool made by the [EQUATOR Network](#) in collaboration with  
20  
21 [Penelope.ai](#)  
22  
23  
24  
25  
26  
27  
28  
29  
30  
31  
32  
33  
34  
35  
36  
37  
38  
39  
40  
41  
42  
43  
44  
45  
46  
47  
48  
49  
50  
51  
52  
53  
54  
55  
56  
57  
58  
59  
60



# BMJ Open

## Semi-structured interviews regarding patients' perceptions of Choosing Wisely and shared decision-making: An Australian study

|                                 |                                                                                                                                                                                                                                                                                                                                                                                                                                                                              |
|---------------------------------|------------------------------------------------------------------------------------------------------------------------------------------------------------------------------------------------------------------------------------------------------------------------------------------------------------------------------------------------------------------------------------------------------------------------------------------------------------------------------|
| Journal:                        | <i>BMJ Open</i>                                                                                                                                                                                                                                                                                                                                                                                                                                                              |
| Manuscript ID                   | bmjopen-2019-031831.R2                                                                                                                                                                                                                                                                                                                                                                                                                                                       |
| Article Type:                   | Research                                                                                                                                                                                                                                                                                                                                                                                                                                                                     |
| Date Submitted by the Author:   | 26-Jul-2019                                                                                                                                                                                                                                                                                                                                                                                                                                                                  |
| Complete List of Authors:       | Allen, Jacqueline; Monash University, School of Nursing and Midwifery King, Richard ; Monash Health<br>Goergen, Stacy; Monash University, Imaging; Monash Health, Radiology<br>Melder, Angela; Monash Univeristy, Monash Centre for Health Research and Implementation,<br>Neeman, Naama; Hudson Institute of Medical Research<br>Hadley, Annemarie; Monash Health<br>Hutchinson, Alison; Deakin University School of Nursing and Midwifery, School of Nursing and Midwifery |
| <b>Primary Subject Heading</b>: | Health services research                                                                                                                                                                                                                                                                                                                                                                                                                                                     |
| Secondary Subject Heading:      | Patient-centred medicine                                                                                                                                                                                                                                                                                                                                                                                                                                                     |
| Keywords:                       | Quality in health care < HEALTH SERVICES ADMINISTRATION & MANAGEMENT, Organisation of health services < HEALTH SERVICES ADMINISTRATION & MANAGEMENT, QUALITATIVE RESEARCH, PUBLIC HEALTH                                                                                                                                                                                                                                                                                     |
|                                 |                                                                                                                                                                                                                                                                                                                                                                                                                                                                              |

SCHOLARONE™  
Manuscripts

## **Semi-structured interviews regarding patients' perceptions of Choosing Wisely and shared decision-making: An Australian study**

Short title: Choosing Wisely Patients' Perspectives

Word length: 3,994

Authors:

Jacqueline Allen (corresponding author), RN, PhD, BA (Hons), MPsyCh  
Senior Lecturer  
Monash University, Clayton, Victoria, School of Nursing and Midwifery  
Wellington Rd, Clayton, 3800, Vic, Australia  
tel:+61 03 9905 5440  
[jacqui.allen@monash.edu](mailto:jacqui.allen@monash.edu)

Associate Professor Richard King, MBBS  
Monash Health  
246 Clayton Rd, Clayton, 3168, Vic, Australia  
[rwfk70@gmail.com](mailto:rwfk70@gmail.com)

Adjunct Clinical Professor Stacy Goergen, MBBS, MCLinEpi, FRANZCR  
Director of Research, Monash Imaging, Monash Health  
246 Clayton Rd, Clayton, 3168, Vic, Australia  
[Stacy.Goergen@monashhealth.org](mailto:Stacy.Goergen@monashhealth.org)

Angela Melder B App Sci (Applied Biology), MPH  
Manager Centre for Clinical Effectiveness, Monash Health  
246 Clayton Rd, Clayton, 3168, Vic, Australia  
[angela.melder@monash.edu](mailto:angela.melder@monash.edu)

Naama Neeman MPH  
Children's Cancer Foundation Administrative Director  
Hudson Institute of Medical Research  
[Naama.neeman@hudson.org.au](mailto:Naama.neeman@hudson.org.au)

Anne Marie Hadley MBBS, BHA  
Chief Experience Officer, Monash Health  
246 Clayton Rd, Clayton, 3168, Vic, Australia  
[Annemarie.Hadley@monashhealth.org](mailto:Annemarie.Hadley@monashhealth.org)

Professor Alison M Hutchinson, RN, PhD, BAppSci (Adv Nsg), MBioeth  
Chair in Nursing (Monash Health)  
Deakin University, Geelong, Victoria, School of Nursing and Midwifery; Centre for Quality and Patient Safety Monash Health Partnership, Monash Health  
221 Burwood Hwy, Burwood, 3125, Vic, Australia  
[alison.hutchinson@deakin.edu.au](mailto:alison.hutchinson@deakin.edu.au)

## Abstract

Objectives: To examine how patients perceive shared decision-making regarding computed tomography (CT) scan referral and use of the five Choosing Wisely questions with their general practitioner (GP).

Design: Qualitative exploratory using semi-structured interviews

Setting: A large metropolitan public healthcare organisation in urban Australia.

Participants: Following purposive sampling, 20 patients and 2 carers participated. Patient participants aged 18 years or over were eligible if they were attending the healthcare organisation for a CT scan and referred by their GP. Carers/family were eligible to participate when they were in the role of an unpaid carer and were aged 18 years or over. Participants were required to speak English sufficiently to provide informed consent. Participants with cognitive impairment were excluded.

Findings: Eighteen interviews were conducted with the patient only. Two interviews were conducted with the patient and the patient's carer. Fourteen participants were female. Five themes resulted from the thematic analysis: 1) Needing to know, 2) Questioning doctors is not necessary, 3) Discussing scans is not required, 4) Uncertainty about questioning, and 5) Valuing the Choosing Wisely questions. Participants reported that they presented to their GP with a health problem that they needed to understand and address. Participants accepted their GPs decision to prescribe a CT scan to identify the nature of their problem. They reported ambivalence about engaging in shared decision-making with their doctor, although, many participants reported valuing the Choosing Wisely questions.

Conclusions: Shared decision-making is an important principle underpinning Choosing Wisely. Practice implementation requires understanding patients' motivations to engage in shared decision-making with a focus on attitudes, beliefs, knowledge and emotions. Systems-level support and education for healthcare practitioners in effective communication is important. However, this needs to emphasise communication with patients who have varying degrees of motivation to engage in shared decision-making and Choosing Wisely.

## Article Summary

Strengths and limitations of this study:

- The qualitative methods enabled a detailed examination of patients' attitudes and beliefs
- Factors supporting the implementation of shared decision-making in Choosing Wisely were identified
- Participants were referred for and attended a CT scan and nothing is known about use of the five Choosing Wisely questions among patients who were not referred for a CT scan.

Data availability: All data relevant to the study are included in the article or uploaded as supplementary information.

Funding statement: This work was supported by funding from Monash Health, Clayton Victoria, Australia.

Competing interests statement: No conflict of interest is reported by the authors.

Author contributions: JA and AH designed and conceptualised the study with RK, SG, AM, NN and AMH. JA recruited participants and collected data. JA and AH analysed data. JA and AH drafted the manuscript with support from RK, SG, AM, NN and AMH.

### Acknowledgements

We are thankful for the support of all patients and carers who generously participated in the study. We acknowledge the support and time of staff at the medical imaging department at Casey Hospital including Nick Ardley, the reception staff and the nursing staff. We acknowledge the support by Monash Health and the Deakin University School of Nursing and Midwifery.

### Keywords

Choosing Wisely, shared decision-making, patients' perspectives, semi-structured interviews

## Introduction

Choosing Wisely is a de-implementation initiative aiming to reduce low value healthcare. Two main principles underpin Choosing Wisely: 1) the responsible stewardship of healthcare resources, and 2) the inclusion of patients in healthcare decisions<sup>1</sup>. Numerous studies have been conducted to assess the implementation of Choosing Wisely in relation to responsible stewardship<sup>2-5</sup>. There is mixed research in relation to shared decision-making. Previous studies have identified that decision support tools facilitate shared decision-making<sup>6 7</sup>. Other research has found that patients overestimate the benefits of medical interventions and underestimate the associated harms<sup>8</sup>. However, few studies have been conducted about shared decision-making from the patient perspective in a de-implementation context such as Choosing Wisely.

### Choosing Wisely

Initiated in 2012 by the American Board of Internal Medicine Foundation, the US-based Consumer Reports, and nine US-based medical specialty societies, the Choosing Wisely campaign aims to avoid healthcare services, including tests and treatments, associated with evidence of low efficacy and / or potential risk of harm to patients<sup>1 4</sup>. Over 20 countries including Canada, Italy, the UK and Australia, have joined the Choosing Wisely initiative. Choosing Wisely emphasises the responsibilities of medical professionals to justly distribute and manage healthcare resources<sup>1 9</sup>. Additionally, Choosing Wisely emphasises shared decision-making between healthcare practitioners and patients<sup>9</sup>.

To date, studies investigating the effectiveness of Choosing Wisely implementation have addressed responsible stewardship in terms of the development of lists of tests and treatments to avoid<sup>10 11</sup>, impact studies<sup>12 13</sup>, education interventions<sup>14</sup> and physician attitudes<sup>15 16</sup>. Previous studies have identified a range of patient attitudes regarding Choosing Wisely. A Canadian study identified that patients endorsed Choosing Wisely values and de-implementing low value care<sup>17</sup>. In an Australian evaluation, 61% of consumer participants indicated that they agreed with the Choosing Wisely campaign and the patient's role in reducing care of low value<sup>18</sup>. However, 61% of participants expected that their medical practitioner should order all medical tests if they were unwell<sup>18</sup>.

## Shared decision-making

Shared decision-making refers to the involvement of patients in making decisions about their health and healthcare with clinicians<sup>6 19</sup>. The Choosing Wisely movement promotes shared decision-making between patients and healthcare professionals in relation to de-implementation of low value care<sup>1 4</sup>. Shared decision-making is promoted through the five Choosing Wisely questions (listed in Box 1) recommended for patients to use in discussions with their healthcare practitioner<sup>18</sup>.

### Box 1 Five Choosing Wisely Questions

1. Do I really need this test or procedure?
2. What are the risks?
3. Are there simpler, safer options?
4. What happens if I don't do anything?
5. What are the costs?<sup>20</sup>

Previous research about shared decision-making has largely focussed on developing and testing decision support tools<sup>19</sup>. In their systematic review, Stacey et al.<sup>6</sup> found good effectiveness of decision support tools on promoting patients' knowledge, communication between patients and practitioners, and patient satisfaction. Another systematic review found that medical practitioners endorse the use of decision support tools<sup>21</sup>. Decision support tools have also been found to challenge practice because of lack of clinician time, lack of care continuity, lack of patient knowledge, and power imbalance between patients and clinicians<sup>7 22</sup>. The decision support tools investigated in these systematic reviews were based on high quality research evidence and addressed a range of focussed health conditions<sup>6 7 19 21</sup>.

Despite the substantial quantity of research in relation to decision support tools<sup>6</sup>, limited research is available about shared decision-making and Choosing Wisely from the patient perspective. Additionally, previous studies about shared decision-making have emphasised specified health problems<sup>19</sup>. We explored patients' perspectives about shared decision-making in relation to computed tomography (CT) scans and any medical condition with their general practitioner (GP) with regard to using the five Choosing Wisely questions. We selected CT scans for inclusion because reductions in CT scans for nominated conditions are

1  
2  
3 one important target area of Choosing Wisely due to the risk of exposure to unnecessary  
4 radiation<sup>19</sup>.

## 7 8 **Research Question**

9  
10 How do patients perceive shared decision-making about CT scan referral and use of the five  
11 Choosing Wisely questions with their GP?  
12

## 14 15 **Methodology**

16  
17  
18 The research design was qualitative exploratory using interviews. The SRQR guidelines were  
19 used to report the study methodology<sup>23</sup>.

## 21 22 **Patient Involvement in Research**

23  
24  
25 Patients were not involved in the development of the research question, study design,  
26 recruitment or conduct of the study. However, the research was designed to elicit patients'  
27 perceptions.  
28

## 29 30 31 **Conceptual Framework**

32  
33  
34 The Theoretical Domains Framework (TDF) formed the conceptual framework underpinning  
35 this study. The TDF was selected because it was developed and validated from a synthesis of  
36 the 33 theories of behaviour change best suited to implementation research and practice<sup>24-26</sup>.  
37 We adopted the most recently published version of the TDF, which comprises 14-domains.  
38 The domains focus on individual motivation for behaviour and change including knowledge,  
39 beliefs, memory and decision processes, social and environmental influences, and emotion<sup>26</sup>.  
40  
41  
42  
43  
44

## 45 46 **Setting**

47  
48 The setting comprised a large metropolitan public healthcare network in south-eastern  
49 Australia. Following referral by their GP, patients attended the health network for an  
50 outpatient CT scan. The public healthcare network provides acute, sub-acute and outpatient  
51 services, including medical imaging, to a culturally and socio-economically diverse  
52 community. Selection of this setting was expected to maximise variation and opportunities  
53 for information about patients from different cultural and socio-economic backgrounds.  
54  
55  
56  
57  
58  
59  
60

## Participants

Purposive sampling using maximum variation for educational background and for socio-economic status was used to select, for a semi-structured interview, up to 20 patients plus or minus carers/family. All patients were aged 18 years or older. Participants were attending the healthcare organisation for a CT scan having been referred by their GP. Where carers/family accompanied the patient, and with the patient's permission, the carer/family member was invited to participate in the interview. Carers/family were eligible to participate when they were in the role of an unpaid carer, as nominated by the patient. Participants were required to be at least 18 years of age and speak English sufficiently to provide informed consent. Where participants had a diagnosis of dementia or cognitive impairment recorded on the GP referral, they were not approached to participate.

## Data collection tools and guidelines

Data collection tools and guidelines comprised a demographic questionnaire and a semi-structured interview guide. These tools and guidelines were developed using the TDF and an earlier unpublished literature review as guides. The demographic questionnaire included questions about the participant's age, gender, country of birth, presenting health problem, educational background and employment. Interview guidelines comprised questions regarding the participant's perceptions of shared decision-making with their GP in relation to their CT scan, and their perceptions of the five Choosing Wisely patient questions. The interview guide for the study is presented in Supplementary file 1.

## Procedure and data collection

Reception staff in the Imaging Department at the participating healthcare organisation identified participants who met the selection criteria. With the participant's permission, the researcher (JA) used the Participant Information and Consent Form (PICF) to introduce the study including the overall goal of improved understanding of patients' perceptions about shared decision-making in order to support patients' conversations with their doctors. Patients who agreed to participate were invited to nominate their informal carer to participate as well. Following an explanation of the study guided by the PICF, written consent from patients and carers was obtained. All participants were provided with a copy of the PICF. The researcher



1  
2  
3 then invited the patient, and if applicable their carer, to complete the demographic  
4 questionnaire to establish their eligibility to participate in the study. The researcher invited  
5 eligible patients and, if acceptable, their carer to participate in a face-to-face semi-structured  
6 interview in a private office at the Imaging Department after their scan, or to participate, at a  
7 later date, in a telephone interview of no more than 45 minutes duration. With permission, the  
8 semi-structured interview was audio-recorded for transcription. Interviews were conducted by  
9 the first author, a registered nurse with professional education in interviewing, at psychology  
10 Master's degree and nursing PhD level, and experience in interviewing patients and carers in  
11 both community health and research contexts. A professional transcriber transcribed the data.  
12  
13  
14  
15  
16  
17  
18  
19

## 20 Data analysis

21  
22 Demographic data were entered into Statistical Package for the Social Sciences version 21.  
23 Categorical information was analysed using frequencies. The inductive analysis technique of  
24 thematic analysis was used to analyse interview data and to make decisions about data  
25 saturation<sup>27 28</sup>. Data saturation occurs when similar codes and categories are identified across  
26 interviews with subsequent interviews identifying no new codes and categories<sup>27 28</sup>. As the  
27 number of participants required to achieve data saturation varies by research project, the  
28 research team decided to conduct an additional six interviews to confirm data saturation.  
29  
30  
31  
32  
33  
34

35 Guided by the research aim and TDF, thematic analysis involved the comparing and  
36 contrasting of codes and categories within and between interviews to identify themes and  
37 sub-themes<sup>27 28</sup>. The first author conducted the data analysis. The last author cross-coded  
38 interview transcripts. The first and last authors discussed codes, categories and themes to test  
39 the interpretation of the data and support a coherent interpretation of the interviews. All data  
40 relevant to the study are included in the article or uploaded as supplementary information.  
41  
42  
43  
44  
45  
46

## 47 Ethics Approvals

48  
49 In accordance with the Australian National Health and Medical Research Council guidelines,  
50 the Ethics Committees at the healthcare organisation and Deakin University provided ethics  
51 approvals. Patients and carers were voluntary participants in the study. Following an  
52 explanation of the study, guided by the PICF, participants provided verbal and written  
53 consent. All data were de-identified. Project identifier numbers were allocated to all  
54 qualitative information.  
55  
56  
57  
58  
59  
60

## Findings

Twenty-two people agreed to participate. Eighteen interviews were conducted with the patient only. At two patients' requests, interviews were conducted with both the patient and the patient's carer who had accompanied them to the medical imaging department. Similar codes and categories were identified during analysis of the first 14 interviews. An additional six interviews were conducted with no new codes and categories emerging. Therefore, data saturation was considered to be achieved after 20 interviews. Most interviews (17) were conducted face-to-face at the healthcare organisation after the participant's scan. Three interviews were conducted by telephone one week after their scan.

Six participants were aged less than 50 years, nine participants were aged 50-69 years, and seven participants were aged 70 to 89 years. Fourteen participants were female and sixteen spoke English at home. Participants experienced a range of health conditions including gastrointestinal problems, respiratory conditions, cardiovascular conditions, neuropathy, and back pain. Other demographic information is presented in Supplementary File 2.

Five themes resulted from the thematic analysis:

1. Needing to know
2. Questioning doctors is not necessary
3. Discussing scans is not required
4. Uncertainty about questioning
5. Valuing the Choosing Wisely questions

### Needing to know

All participants noted that they required a CT scan because they needed to know what was wrong with them. All participants commented that their need to know what was wrong with them was the main reason for booking an appointment with their GP. According to one carer:

'I don't think there was too much to decide. She [patient] complained about the pain and the doctor wanted to do this [CT scan] to see what's going on there. She just wants to feel a bit better. She would probably have any procedure.' (P2)

The scan was important to most participants in order to plan and prepare for treatment to resolve their health problem. Three participants noted that the scan was important for their

1  
2  
3 peace of mind so that they could prepare for pain in the future and rule ‘sinister’ things out.  
4  
5 Two participants considered that the scan was important to help remove their pain. One  
6  
7 participant wanted to be sure that their infection was gone. Another participant wanted to be  
8  
9 properly diagnosed to stop people doubting that he had back problems. One patient  
10  
11 commented:

12  
13 ‘...peace of mind is the right thing, but I think it’s [the CT scan] just to know what’s going on  
14  
15 so I can prepare myself.’ (P7)

### 16 17 Questioning doctors is not necessary

18  
19  
20 Participants explained their perspectives about communicating with their doctor in the theme  
21  
22 ‘Questioning doctors is not necessary’. Many participants commented on their belief that  
23  
24 their doctors made the right decision by requesting a CT scan for the quickest assessment of  
25  
26 their illness. According to these participants, they did not have a discussion with their doctor  
27  
28 or ask questions, as this was not perceived to be necessary.

29  
30 ‘Our doctor, she’s a doctor who doesn’t want you to have unnecessary tests. We know that  
31  
32 about her because she said that. So that when she recommends a test we tend to just think,  
33  
34 yeah.’ (Patient, P6)

35  
36 According to several participants, their doctor explained radiation and reassured them about  
37  
38 the risk, therefore there was no need to ask questions. According to other participants,  
39  
40 because they had a relationship with their doctor, there was no need for discussion:

41  
42 ‘I’ve been seeing her [the GP] for a while, I haven’t had many CTs or x-rays done but I  
43  
44 vaguely remember years ago her explaining radiation and not to be too stressed about it. This  
45  
46 time ‘No’ because we’ve got an established relationship so she doesn’t really need to rehash.’  
47  
48 (Patient, P3)

49  
50 Several participants commented that they trusted their doctor and their doctor’s knowledge,  
51  
52 and complied with their doctor’s suggestions and decisions because they wished to feel  
53  
54 better. Additionally, since they trusted their doctor’s judgment and knowledge, they  
55  
56 considered that asking questions about the decision to have a CT scan was not important or  
57  
58 necessary. One patient commented:  
59  
60

1  
2  
3  
4  
5  
6  
7  
8  
9  
10  
11  
12  
13  
14  
15  
16  
17  
18  
19  
20  
21  
22  
23  
24  
25  
26  
27  
28  
29  
30  
31  
32  
33  
34  
35  
36  
37  
38  
39  
40  
41  
42  
43  
44  
45  
46  
47  
48  
49  
50  
51  
52  
53  
54  
55  
56  
57  
58  
59  
60

‘All through life you have to have x-rays. In the long run, it might cause some of your cancers. I don’t know. But I don’t think it would change me. You see people have got to keep believing in their GP. If you lose the trust. ... I wouldn’t even go to a GP. That defeats the purpose.’ (P20)

Most participants considered that people of older generations and also from some traditional family backgrounds and cultures might feel that it was disrespectful to ask their doctor any questions. Several participants commented that when a patient is in pain or very unwell they would not be well enough to ask questions.

Two participants noted that they needed to be their own advocate with their doctor and ensure that they were listened to. According to one participant, being her own advocate was important, as doctors could not know everything and could assume that patients wanted a quick answer to their problems:

‘I think you’ve got to be your own advocate. ... You have to stand up and speak for yourself, and listen. ... Because sometimes they [the doctors] don’t know better.’ (Patient, P4)

### Discussing scans is not required

In the third theme ‘Discussing scans is not required’, participants explained their perspectives about deciding to have a CT scan. Most participants commented that they did not want more discussion with their doctor, because they knew what the scan was for, understood their CT scan and experienced no anxiety. Thirteen participants noted that as they had undergone at least one CT scan in the past, they were familiar with CT scans and understood what to expect. Nine participants reported that they were satisfied with the explanation about the purpose of the CT scan they received from their doctor.

‘I understand most of what is going on a lot of the time anyway, so I don’t really need to ask a lot of questions. I do ask when I need to but this wasn’t a case that I needed to.’ (Patient, P13)

Two participants did not want to ask any questions because they perceived this would make them anxious. One participant did not ask questions, because she did not want to know details about her diagnosis. Four participants commented that they asked questions of their doctor during the consultation to clarify the need for the scan.

1  
2  
3 According to most participants, discussion about the pros and cons of their scan was not  
4 desirable because they had already received adequate information from their GP about CT  
5 scans at previous consultations and they had acquired a good understanding of the risks and  
6 benefits. Two participants noted that their doctor explained the pros and cons of their scan to  
7 them, and nine participants commented that this was not explained to them. Three  
8 participants reported their belief that they needed to have the scan done and therefore did not  
9 consider that questions about the pros and cons of the scan were necessary. One participant  
10 reflected that he should have asked about the pros and cons of his scan, however he  
11 understood that his scan was a straightforward CT scan.

12  
13 Most participants reported that as far as they were aware there were no major disadvantages  
14 of having a CT scan and the most important thing was to find out what was wrong with their  
15 health. Several participants considered that CT scans were safe. Other participants noted  
16 some disadvantages of CT scans. Four participants noted that people should not be exposed  
17 to CT scans too often due to radiation although this risk was considered minimal. Several  
18 participants reported that their doctor had informed them of this risk. According to one  
19 patient:

20  
21  
22  
23  
24  
25  
26  
27  
28  
29  
30  
31  
32  
33  
34  
35  
36  
37  
38  
39  
40  
41  
42  
43  
44  
45  
46  
47  
48  
49  
50  
51  
52  
53  
54  
55  
56  
57  
58  
59  
60  
‘Why would there be a disadvantage [of the CT scan]? ... I’ve had three CT scans in 12  
months, so I don’t find that over excessive.’ (P1)

### Uncertainty about questioning

In the theme ‘Uncertainty about questioning’, many participants expressed uncertainty and  
hesitation about the usefulness of the five Choosing Wisely questions for themselves and for  
others in decision making with their doctors. Eighteen participants commented that they had  
not seen the five Choosing Wisely questions before. Some participants reported their belief  
that patients should use the questions yet many patients do not ask their doctors questions.  
Several participants noted that the doctor would need to explain the five Choosing Wisely  
questions to patients in order for the questions to be used. Many participants commented that  
they did not need to ask their doctors the five Choosing Wisely questions due to the quality  
trusting relationship that they had with their doctor and their assumption that the doctor knew  
best. According to these participants, people without a trusting relationship with their doctor  
would need to ask questions. Other participants considered that patients would only be able to

1  
2  
3 ask questions of their doctor if they had a trusting relationship where their doctor would  
4 accept a patient asking questions.  
5

6  
7  
8 ‘I think if you have a good relationship or have trust with your doctor, your GP, I guess you  
9 just would assume that she is going to decide the right thing for you.’ (P05)  
10

11  
12 ‘It depends on the relationship that they have with their doctor. I think that if you don’t really  
13 know your doctor and you don’t trust your doctor then it [the five Choosing Wisely  
14 questions] potentially can help.’ (P07)  
15  
16

17  
18 ‘I think some people would [ask the five Choosing Wisely questions] and some people  
19 wouldn’t. Some people are very switched on and want to know things and other people still  
20 have that, well the doctor knows best. I’ll do what you tell me.’ (P10)  
21  
22

23  
24 Three participants were undecided about whether the five Choosing Wisely questions would  
25 assist a patient to weigh benefits against risks. One participant noted that he had everything  
26 explained to him and he would not need to question his doctor. However, where patients did  
27 not have a relationship with their doctor they may need to use the Choosing Wisely questions  
28 to weight up benefits against risks for themselves. One participant considered that patients  
29 would agree with the doctor and not use the questions. One participant reflected that patients  
30 might be too afraid of the answers from their doctor, in relation to risks, if they were to ask  
31 the five Choosing Wisely questions. Some people would prefer not to know and would not  
32 use the questions. According to one patient:  
33  
34  
35  
36  
37  
38  
39

40  
41 ‘It’s a scary thing to ask questions you really sometimes don’t want to hear what they’ve [the  
42 doctor] got to say.’ (P9)  
43  
44

45  
46 Six participants commented that they would not use the five Choosing Wisely questions, as  
47 they needed their scan in order to recover their health. Several other participants commented  
48 that they would never opt to do nothing and therefore they would not ask their doctor the  
49 Choosing Wisely question ‘What happens if I don’t do anything?’ According to two  
50 participants, doctors may not want patients to ask them questions. Further, it was perceived  
51 that some patients may not want to ask their doctors questions since they may feel that  
52 questioning the doctor is too confrontational. One patient noted:  
53  
54  
55  
56  
57  
58  
59  
60

1  
2  
3 ‘Do I really need this test or procedure? I think it’s almost questioning the doctor. I think  
4 there is potential for some doctors to have their nose out of joint’. (P7)  
5  
6  
7

### 8 Valuing the Choosing Wisely questions 9

10 All participants were invited to discuss the value of the questions. However, only fourteen  
11 participants commented. These participants expressed a range of views about the value of the  
12 questions. Several participants considered the questions were valuable because they guided  
13 patients to reflect on decisions with their doctor and to take greater responsibility for their  
14 healthcare decisions. One carer participant reported their belief that some people did have  
15 unnecessary tests and procedures and that there may be associated risks that were not  
16 considered. According to this carer, some people thought that an x-ray test was just like  
17 taking a photograph with no risks and therefore the Choosing Wisely questions could be  
18 valuable in prompting patients to consider risks with their doctors. Another participant further  
19 explained that during a consultation with a doctor, patients were more concerned with what  
20 they thought that they needed. According to this participant, the questions would prompt a  
21 patient to consider additional priorities such as are there safer or cheaper options. Two  
22 participants reported that the questions would be valuable because they would increase the  
23 information available to patients, which would be reassuring for patients in making decisions  
24 with their doctors. Another two participants noted that the questions would be valuable as a  
25 memory prompt for patients. According to one patient:  
26  
27  
28  
29  
30  
31  
32  
33  
34  
35  
36  
37  
38

39 ‘I think it [the five Choosing Wisely questions] might jolt a person’s memory. It might  
40 engage the patient on a different level. You know outside their paradigm of thinking. So it’s a  
41 bit like a safety map. (P18)  
42  
43  
44

45 Some participants commented that the five Choosing Wisely questions were valuable because  
46 availability of the questions would give patients permission to ask questions of their doctors.  
47 According to one participant, some people believed that they were not permitted to ask their  
48 doctors questions and needed to know that asking doctors questions was acceptable. Several  
49 participants noted that the questions would need to be brought to patients’ attention by  
50 doctors to signal to patients that it was acceptable to ask questions.  
51  
52  
53  
54  
55

56 ‘I think ... some patients need to have that so that they’re given permission in their minds to  
57 ask those questions.’ (P06)  
58  
59  
60

1  
2  
3 ‘Some people just do what they’re told. But if there was a set of questions then they would  
4 know to ask wouldn’t they?’ (P21)  
5  
6

7  
8 Additionally, participants commented on a range of facilitators and barriers to using the five  
9 Choosing Wisely questions. These are listed in Supplementary File 3. Several participants  
10 reported that they did not find the Choosing Wisely question regarding costs was valuable as  
11 they considered that it was not applicable to the publicly funded Australian health setting.  
12  
13 Two participants asked if the Choosing Wisely question pertaining to costs reflected  
14 monetary costs or human costs.  
15  
16  
17

## 18 19 **Discussion**

20  
21 Findings indicate that participants presented to their GP with a health problem that they  
22 needed to understand and address. Participants accepted their GPs decision to prescribe a CT  
23 scan to identify the nature of the problem. Participants reported ambivalence about using the  
24 five Choosing Wisely questions with their doctor; although, many participants reported  
25 valuing these questions. Few past studies have examined using the five Choosing Wisely  
26 questions from the patient perspective<sup>17 18</sup>. Findings from the current study contribute  
27 knowledge about patients’ use of questions in healthcare contexts of de-implementation of  
28 low value care.  
29  
30  
31  
32  
33  
34  
35

36  
37 Previous research about shared decision-making has found decision support tools with clearly  
38 articulated decision choices are effective<sup>6 19 21</sup>. Asking questions, such as use of the five  
39 Choosing wisely questions, is one part of shared decision-making<sup>1 9</sup>. However, in the current  
40 study, findings indicate that all participants perceived that they required a solution to their  
41 health problem in the form of an investigatory intervention. Although many participants  
42 understood the value of Choosing Wisely in terms of healthcare stewardship, when the  
43 decision was about their own health directly, they expected their doctor to order all medical  
44 tests. Most participants expected that their GP would make this decision and that the tests  
45 would be beneficial. These findings are aligned with previous research that patients  
46 overestimate the benefits and underestimate the harms of medical interventions<sup>8 18</sup>.  
47  
48

49  
50 Implementation of the five Choosing Wisely questions into practice is complicated by  
51 patients’ beliefs, attitudes, knowledge and emotions<sup>26</sup>. Although the Choosing Wisely  
52 literature emphasises the need to change patients’ expectations<sup>4 18</sup> few studies have examined  
53 implementation facilitators and barriers from patients’ perspectives. The current study  
54  
55  
56  
57  
58  
59  
60



1  
2  
3 highlights the role of patients' motivation in using the five Choosing Wisely questions and  
4 de-implementation of low value care.  
5  
6

7 Our findings also indicate a lack of consumer and patient awareness of the five questions.

8 This is reflective of the emphasis to date of the Choosing Wisely campaign upon  
9 disinvestment by health practitioners and healthcare organisations in low value care, without  
10 similar efforts being made to educate patients and consumers about how to engage in shared  
11 decision-making by using the five questions.  
12  
13  
14  
15

16 Some participants commented on the value of the five Choosing Wisely questions as a signal  
17 that patients were permitted to ask questions of their doctor. The availability and application  
18 of communication tools such as the five Choosing Wisely questions may assist patients in  
19 addressing their lack of knowledge and the power imbalance between patients and clinicians.  
20 Although this may improve shared decision-making in de-implementation of low value care,  
21 support for general practitioners to engage and educate patients about using the five Choosing  
22 Wisely questions is needed. This may require a focus on giving patients permission to ask  
23 their doctors questions about the benefits of a watch and wait approach.  
24  
25  
26  
27  
28  
29  
30  
31

### 32 Further research

33 The five Choosing Wisely questions are a communication rather than a decision support tool.  
34 Research about decision support tools inclusive of communication guides and de-  
35 implementation in primary care contexts is warranted with focus on understanding patient  
36 motivation and also on empowering patients to ask questions and engage in shared decision  
37 making. Research with larger representative samples to ascertain patients' perspectives would  
38 add knowledge at population levels. Further research is required in regard to the  
39 implementation of the five Choosing Wisely questions in defined populations with potentially  
40 different motivation for shared decision-making such as people living with chronic illness  
41 engaged in self-management.  
42  
43  
44  
45  
46  
47  
48  
49  
50

### 51 Study strengths and limitations

52 Findings from the current study may have application to similar contexts of care elsewhere.  
53 The study included a small sample using semi-structured interviews. This enabled a detailed  
54 descriptive exploration of participant's attitudes, beliefs and knowledge, and identification of  
55 factors and processes facilitating and constraining patients' use of the Choosing Wisely  
56  
57  
58  
59  
60

1  
2  
3 questions. The participants in the current study were all referred for and attended a CT scan  
4 and nothing is known about use of the five Choosing Wisely questions among patients who  
5 were not referred for a CT scan. Many participants had experienced a previous CT scan and  
6 this may have limited their perceived need to question their doctor. The timing of the  
7 interview after the CT scan may have predisposed participants to assume that the test was  
8 beneficial. Additionally, three interviews were conducted one week after their scan and this  
9 may have affected recall bias.

## 16 **Conclusions and Implications for Practice**

19 Shared decision-making is a principle underpinning Choosing Wisely. This ideal may not be  
20 matched in practice where patients seek a solution from an authoritative expert clinician such  
21 as a medical practitioner. Patients may require education that they are permitted to ask  
22 questions of their medical practitioner. Patients' motivation to engage in shared decision-  
23 making requires clinicians' understanding of patients' attitudes, beliefs, knowledge and  
24 emotions. Systems support and education for healthcare practitioners in effective  
25 communication is essential. However, this needs to emphasise communication with patients  
26 with varying motivation to engage in shared decision-making. Skilful application with  
27 patients of available communication tools, such as the five Choosing Wisely questions, and  
28 paid clinician time to undertake this important healthcare practice, are imperative to future  
29 success in implementation of Choosing Wisely.

## 45 **References**

- 47 1. Wolfson D, Santa J, Slass L. Engaging physicians and consumers in conversations about  
48 treatment overuse and waste: a short history of the choosing wisely campaign.  
49 *Academic Medicine: Journal Of The Association Of American Medical Colleges*  
50 2014;89(7):990-95. doi: 10.1097/ACM.0000000000000270
- 51 2. Greene SE, Massone R. A survey of emergency medicine residents' perspectives of the  
52 choosing wisely campaign. Philadelphia, Pennsylvania: Elsevier B.V., 2015:853-55.
- 53 3. Zikmund-Fisher B, Kullgren J, Fagerlin A, et al. Perceived Barriers to Implementing  
54 Individual Choosing Wisely® Recommendations in Two National Surveys of Primary  
55 Care Providers. *JGIM: Journal of General Internal Medicine* 2017;32(2):210-17. doi:  
56 10.1007/s11606-016-3853-5

- 1  
2  
3 4. Schlesinger M, Grob R. Treating, Fast and Slow: Americans' Understanding of and  
4 Responses to Low-Value Care. *Milbank Quarterly* 2017;95(1):70-116. doi:  
5 10.1111/1468-0009.12246  
6
- 7  
8 5. Levinson W, Kallewaard M, Bhatia RS, et al. 'Choosing Wisely': a growing international  
9 campaign. *BMJ Quality & Safety* 2015;24(2):167-74. doi: 10.1136/bmjqs-2014-  
10 003821  
11
- 12  
13 6. Stacey D, Legare F, Lewis KB, et al. Decision aids to help people who are facing health  
14 treatment or screening decisions. *Cochrane Database of Systematic Reviews* 2017 doi:  
15 DOI: 10.1002/14651858.CD001431.pub5  
16
- 17  
18 7. Joseph-Williams N, Elwyn G, Edwards AG. Knowledge is not power for patients: a  
19 systematic review and thematic synthesis of patient-reported barriers and facilitators  
20 to shared decision making. *Patient Education & Counseling* 2014;94(3):291-309.  
21
- 22  
23 8. Hoffmann T, Del Mar C. Patients' expectations of the benefits and harms of treatments,  
24 screening, and tests: A systematic review. *Journal of the American Medical  
25 Association* 2015;175:274-86.  
26
- 27  
28 9. Choosing Wisely. Choosing Wisely: A Special Report on the first five years USA2019  
29 [Available from: [http://www.choosingwisely.org/wp-](http://www.choosingwisely.org/wp-content/uploads/2017/10/Choosing-Wisely-at-Five.pdf)  
30 content/uploads/2017/10/Choosing-Wisely-at-Five.pdf].  
31
- 32  
33 10. Hahn C, Kavanagh B, Bhatnagar A, et al. Choosing wisely: The American Society for  
34 radiation oncology's top 5 list. *Practical Radiation Oncology* 2014;4(6):349-55.  
35
- 36  
37 11. Lusiani L, Frediani R, Nardi R, et al. Doing more does not mean doing better: The  
38 FACOI contribution to the slow medicine program for a sustainable and wise  
39 healthcare system. *Italian Journal of Medicine* 2015;9(3):281-86.  
40
- 41  
42 12. Simos D, Hutton B, Clemons M. Are Physicians Choosing Wisely When Imaging for  
43 Distant Metastases in Women With Operable Breast Cancer? *Journal of Oncology  
44 Practice* 2015;11(1):62-68. doi: 10.1200/JOP.2014.000125  
45
- 46  
47 13. Figar S, Finakly S, Wong CJ, et al. Retrospective audit of plain film imaging in acute  
48 ankle trauma: Are we choosing wisely? *Journal of Medical Imaging and Radiation  
49 Oncology* 2017;61:149-50.  
50
- 51  
52 14. Hair H, Boudreau D, Rice C, et al. A patient focused information design intervention to  
53 support the mTBI Choosing Wisely recommendation. *Canadian Journal of  
54 Emergency Medicine* 2017;19:S71.  
55
- 56  
57 15. Lin MP, Nguyen T, Probst MA, et al. Emergency Physician Knowledge, Attitudes, and  
58 Behavior Regarding ACEP's Choosing Wisely Recommendations: A Survey Study.  
59 *Academic Emergency Medicine* 2017;24(6):668-75. doi: 10.1111/acem.13167  
60
- 60  
61 16. Gieniusz M, Kozikowski A, Williams M, et al. Peg tubes in patients with advanced  
62 dementia: Are we 'choosing wisely?'. *Journal of the American Geriatrics Society*  
63 2017;65:S77.

17. Silverstein W, Lass E, Born KB, et al. A survey of primary care patients' readiness to engage in the de-adoption practices recommended by Choosing Wisely Canada. *BMC Research Notes* 2016;9:301-8.
18. NPS MedicineWise. Choosing Wisely Australia 2017 report. Canberra: Choosing Wisely Australia, 2017.
19. Clifford AM, Ryan J, Walsh C, et al. What information is used in treatment decision aids? A systematic review of the types of evidence populating health decision aids. *BMC Medical Informatics & Decision Making* 2017;17:1-15. doi: 10.1186/s12911-017-0415-7
20. Choosing Wisely Australia. 5 questions to ask your doctor or other healthcare provider 2019 [Available from: <http://www.choosingwisely.org.au/resources/consumers/5-questions-to-ask-your-doctor>].
21. Pollard S, Bansback N, Bryan S. Physician attitudes toward shared decision making: A systematic review. *Patient Education & Counseling* 2015;98(9):1046-57. doi: 10.1016/j.pec.2015.05.004
22. Elwyn G, Scholl I, Tietbohl C, et al. 'Many miles to go ...': a systematic review of the implementation of patient decision support interventions into routine clinical practice. *BMC Medical Informatics & Decision Making* 2013;13:S14-S14. doi: 10.1186/1472-6947-13-S2-S14
23. O'Brien B, Harris I, Beckman T, et al. Standards for reporting qualitative research: A synthesis of recommendations. *Academic Medicine: Journal Of The Association Of American Medical Colleges* 2014;89(9):1245-51.
24. Cane J, O'Connor D, Michie S. Validation of the theoretical domains framework for use in behaviour change and implementation research. *Implementation Science* 2012;7:37-53. doi: 10.1186/1748-5908-7-37
25. Michie S, Johnson M, Abraham C, et al. Making psychological theory useful for implementing evidence based practice: a consensus approach. *Quality and Safety in HealthCare* 2005;14:26-33.
26. Atkins L, Francis J, Islam R, et al. A guide to using the Theoretical Domains Framework of behaviour change to investigate implementation problems. *Implementation Science* 2017;12:77. doi: <https://doi.org/10.1186/s13012-017-0605-9>
27. Spencer L, Ritchie J, Ormston R, et al. Analysis principles and processes. In: Ritchie J, Lewis J, McNaughton Nicholls C, et al., eds. *Qualitative Research Practice: A Guide for Social Science Students & Researchers*. London: Sage 2014:269-95.
28. Spencer L, Ritchie J, O'Connor W, et al. Analysis in practice. In: Ritchie J, Lewis C, McNaughton Nicholls C, et al., eds. *Qualitative Research Practice: A Guide for Social Science Students & Researchers*. London: Sage 2014:295-347.

## Supplementary File 1: Interview Guide

You are being asked to participate in this research project because we would like to know your views with respect to the use of some questions. These questions are recommended for use by patients in conversation with their general practitioner when deciding to have a CT scan. The recommended questions are:

1. Do I really need this test or procedure?
2. What are the risks?
3. Are there simpler, safer options?
4. What happens if I don't do anything?
5. What are the costs?

The interview should take approximately 30-45 minutes and with your permission it will be digitally-recorded to ensure that all key points are accurately documented. Any identifying information (for example the names of other individuals) that you use in the course of our discussion will be removed from the interview transcripts. If you wish to end the interview before I have asked all of the questions or if you wish to withdraw from the study you are free to do so.

There may appear to be overlap between the interview questions that form part of the interview. Each question is worded to obtain specific information and so you may find that answers are repeated. It is important to note that there are no right or wrong answers to the questions and that no one will know what your specific answers were.

Note to the Interviewer: Depending on how the participant answers the questions, the order in which these questions are asked can change.

### Questions

1. Tell me about your visit to medical imaging?

Prompts:

What test are you having?

What are you having the test for?

What is the most important thing about having the test?

What are the disadvantages of having the test?)

2. Tell me about the decision to have the test?

Prompts:

Did you have a discussion/ask about it as an option with your doctor?

What was important in the discussion?

What questions did you ask?

What was missing in the discussion? i.e. was there information that you desired, but did not receive?

3. Was the reason/pros and cons for having the test explained to you?

Prompts:

What were the benefits of having the test done?

What were the negative aspects of having the test done?

Did you feel you had an option to choose (or choose not) to have the test done?

- 1  
2  
3           ○ How did you come to your decision?  
4 4. Did deciding to have the test cause you anxiety or stress? If yes, can you explain?  
5           Alternative to Question 4:  
6

7           What feelings or emotions did you feel when deciding to have the test?  
8

- 9 5. Do you know other patient(s) who have had the test done?  
10           Prompts:  
11           Did this influence your opinion of the test? (“Good or bad” to have it done?)  
12 6. Have you heard of the following five questions that you can use to find out information  
13 from your doctor about your test?  
14  
15

16 (Instructions for interviewer: Provide patient with printed list of the following questions)

- 17 1. Do I really need this test or procedure?  
18 2. What are the risks?  
19 3. Are there simpler, safer options?  
20 4. What happens if I don't do anything?  
21 5. What are the costs?  
22 7. If patients new about these questions, do you think they would ask the questions of their  
23 doctors?  
24           Prompts:  
25           What would help them to ask?  
26           What would stop them asking these questions?  
27  
28 8. Do you think the five questions would help patients to weigh up the benefits compared to  
29 the risks of having the test?  
30           Prompts:  
31           If so, how would the questions help?  
32           If not, can you tell me more about why?  
33  
34 9. Do you have any suggestions for how to inform patients about these questions? If so, what  
35 are your suggestions?  
36  
37  
38  
39  
40  
41  
42  
43  
44  
45  
46  
47  
48  
49  
50  
51  
52  
53  
54  
55  
56  
57  
58  
59  
60

**Supplementary File 2. Demographic Characteristics of Participants (N=22)**

| Demographic information                   | Frequency (%) |
|-------------------------------------------|---------------|
| Country of birth                          |               |
| Australia/NZ                              | 13 (59.1)     |
| United Kingdom                            | 3 (13.6)      |
| Hungary                                   | 2 (9.1)       |
| China                                     | 2 (9.1)       |
| South Africa                              | 1 (4.5)       |
| Netherlands                               | 1 (4.5)       |
| Completed secondary school education      |               |
| Year 12                                   | 9 (30.0)      |
| Year 11                                   | 6 (20.0)      |
| Year 10                                   | 4 (13.3)      |
| Less than year 9                          | 3 (10.0)      |
| Completed post secondary school education |               |
| University degree                         | 6 (27.3)      |
| Vocational Education and Training         | 8 (26.7)      |
| Nil                                       | 8 (26.7)      |
| Occupation                                |               |
| Registered nurse/Enrolled nurse           | 3 (13.6)      |
| Housekeeper/cook                          | 3 (13.6)      |
| Teacher                                   | 2 (9.1)       |
| Home duties                               | 2 (9.1)       |
| Manager/accounting                        | 2 (9.1)       |
| Unemployed                                | 2 (9.1)       |
| Other                                     | 8 (36.4)      |

---

**Income source**

|                                    |          |
|------------------------------------|----------|
| Employed                           | 8 (36.4) |
| Self-funded retirement             | 3 (13.6) |
| Unemployment or disability benefit | 3 (13.6) |
| Old age pension/veterans' pension  | 8 (36.4) |

**Retired**

|     |           |
|-----|-----------|
| Yes | 11 (50.0) |
| No  | 11 (50.0) |

---



## Supplementary File 3: Facilitators and Barriers to using the Five Choosing Wisely Questions

---

### Facilitators and barriers

---

#### Facilitators

##### **A good relationship with the doctor**

A doctor who can explain things

Doctors who are patient friendly

Doctors who have empathy

##### **Availability in different languages**

Five Choosing Wisely questions need to be available in different languages

##### **Advertise the questions**

Advertise the five Choosing Wisely questions (TV, Social Media, Presentations)

Make information available on the clinic/health service website – Do you know your rights? Do you know that you can ask questions?

##### **Educate patients that they are allowed to ask questions**

Assist patients to know about the five Choosing Wisely questions

Make the questions available in the GP clinic and reception area ‘These are your rights?’ ‘Did you know that you can ask these questions?’

Posters

Questions available on the table in the waiting room

GP to hand patient a card/pamphlet containing the questions and explain the questions

##### **Format and title of the questions**

Title of the questions ‘Being better informed, questions to help your care’

Ensure an official logo is on the questions to show that they are endorsed by doctors

Questions need to be in bold so that people can read them

#### Barriers

##### **Doctors who are not approachable**

Limited GP time

Doctors are in a rush

Doctors are encouraged to have very short consultations with their patients

Doctors who are intimidating or not approachable

---

**Fear and embarrassment**

Fear of asking the questions

Fear of the answer to the questions

Fear of asking the questions the wrong way (CALD patients)

Embarrassing to ask questions because don't know how to ask (CALD patients)

Some people may not be comfortable with the word 'risk'

Fear of offending the doctor, appearing to question the doctor's knowledge

**Too unwell to ask questions**

Too unwell or overwhelmed with the medical problem to ask questions

People experiencing pain

**Lack of awareness of the need for questions**

Lack of awareness of the need to ask questions

The patient thought they knew the answers already (by using the internet, previous experience of a CT scan)

**Patients who do not speak English**

People who do not speak or read English will not be able to use the questions

---

# Reporting checklist for qualitative study.

Based on the SRQR guidelines.

## Instructions to authors

Complete this checklist by entering the page numbers from your manuscript where readers will find each of the items listed below.

Your article may not currently address all the items on the checklist. Please modify your text to include the missing information. If you are certain that an item does not apply, please write "n/a" and provide a short explanation.

Upload your completed checklist as an extra file when you submit to a journal.

In your methods section, say that you used the SRQR reporting guidelines, and cite them as:

O'Brien BC, Harris IB, Beckman TJ, Reed DA, Cook DA. Standards for reporting qualitative research: a synthesis of recommendations. Acad Med. 2014;89(9):1245-1251.

|              | Reporting Item                                                                                                                                                                                                                                          | Page Number |
|--------------|---------------------------------------------------------------------------------------------------------------------------------------------------------------------------------------------------------------------------------------------------------|-------------|
| <b>Title</b> | <a href="#">#1</a> Concise description of the nature and topic of the study identifying the study as qualitative or indicating the approach (e.g. ethnography, grounded theory) or data collection methods (e.g. interview, focus group) is recommended | Title page  |

## Abstract

|    |                       |                    |                                                        |     |
|----|-----------------------|--------------------|--------------------------------------------------------|-----|
| 1  |                       | <a href="#">#2</a> | Summary of the key elements of the study               | 2   |
| 2  |                       |                    |                                                        |     |
| 3  |                       |                    |                                                        |     |
| 4  |                       |                    | using the abstract format of the intended              |     |
| 5  |                       |                    |                                                        |     |
| 6  |                       |                    | publication; typically includes background,            |     |
| 7  |                       |                    |                                                        |     |
| 8  |                       |                    | purpose, methods, results and conclusions              |     |
| 9  |                       |                    |                                                        |     |
| 10 |                       |                    |                                                        |     |
| 11 | <b>Introduction</b>   |                    |                                                        |     |
| 12 |                       |                    |                                                        |     |
| 13 |                       |                    |                                                        |     |
| 14 | Problem formulation   | <a href="#">#3</a> | Description and significance of the problem /          | 4-6 |
| 15 |                       |                    |                                                        |     |
| 16 |                       |                    | phenomenon studied: review of relevant theory          |     |
| 17 |                       |                    |                                                        |     |
| 18 |                       |                    | and empirical work; problem statement                  |     |
| 19 |                       |                    |                                                        |     |
| 20 |                       |                    |                                                        |     |
| 21 |                       |                    |                                                        |     |
| 22 | Purpose or research   | <a href="#">#4</a> | Purpose of the study and specific objectives or        | 6   |
| 23 |                       |                    |                                                        |     |
| 24 | question              |                    | questions                                              |     |
| 25 |                       |                    |                                                        |     |
| 26 |                       |                    |                                                        |     |
| 27 | <b>Methods</b>        |                    |                                                        |     |
| 28 |                       |                    |                                                        |     |
| 29 |                       |                    |                                                        |     |
| 30 | Qualitative approach  | <a href="#">#5</a> | Qualitative approach (e.g. ethnography,                | 6   |
| 31 |                       |                    |                                                        |     |
| 32 | and research paradigm |                    | grounded theory, case study, phenomenology,            |     |
| 33 |                       |                    |                                                        |     |
| 34 |                       |                    | narrative research) and guiding theory if              |     |
| 35 |                       |                    |                                                        |     |
| 36 |                       |                    | appropriate; identifying the research paradigm         |     |
| 37 |                       |                    |                                                        |     |
| 38 |                       |                    | (e.g. postpositivist, constructivist / interpretivist) |     |
| 39 |                       |                    |                                                        |     |
| 40 |                       |                    | is also recommended; rationale. The rationale          |     |
| 41 |                       |                    |                                                        |     |
| 42 |                       |                    | should briefly discuss the justification for           |     |
| 43 |                       |                    |                                                        |     |
| 44 |                       |                    | choosing that theory, approach, method or              |     |
| 45 |                       |                    |                                                        |     |
| 46 |                       |                    | technique rather than other options available;         |     |
| 47 |                       |                    |                                                        |     |
| 48 |                       |                    | the assumptions and limitations implicit in            |     |
| 49 |                       |                    |                                                        |     |
| 50 |                       |                    | those choices and how those choices influence          |     |
| 51 |                       |                    |                                                        |     |
| 52 |                       |                    | study conclusions and transferability. As              |     |
| 53 |                       |                    |                                                        |     |
| 54 |                       |                    |                                                        |     |
| 55 |                       |                    |                                                        |     |
| 56 |                       |                    |                                                        |     |
| 57 |                       |                    |                                                        |     |
| 58 |                       |                    |                                                        |     |
| 59 |                       |                    |                                                        |     |
| 60 |                       |                    |                                                        |     |

appropriate the rationale for several items

might be discussed together.

|    |                     |                     |     |
|----|---------------------|---------------------|-----|
| 1  |                     |                     |     |
| 2  |                     |                     |     |
| 3  |                     |                     |     |
| 4  |                     |                     |     |
| 5  |                     |                     |     |
| 6  | Researcher          | <a href="#">#6</a>  | 8   |
| 7  |                     |                     |     |
| 8  | characteristics and |                     |     |
| 9  |                     |                     |     |
| 10 | reflexivity         |                     |     |
| 11 |                     |                     |     |
| 12 |                     |                     |     |
| 13 |                     |                     |     |
| 14 |                     |                     |     |
| 15 |                     |                     |     |
| 16 |                     |                     |     |
| 17 |                     |                     |     |
| 18 |                     |                     |     |
| 19 |                     |                     |     |
| 20 |                     |                     |     |
| 21 |                     |                     |     |
| 22 |                     |                     |     |
| 23 |                     |                     |     |
| 24 |                     |                     |     |
| 25 | Context             | <a href="#">#7</a>  | 6   |
| 26 |                     |                     |     |
| 27 |                     |                     |     |
| 28 |                     |                     |     |
| 29 |                     |                     |     |
| 30 | Sampling strategy   | <a href="#">#8</a>  | 7   |
| 31 |                     |                     |     |
| 32 |                     |                     |     |
| 33 |                     |                     |     |
| 34 |                     |                     |     |
| 35 |                     |                     |     |
| 36 |                     |                     |     |
| 37 |                     |                     |     |
| 38 |                     |                     |     |
| 39 |                     |                     |     |
| 40 | Ethical issues      | <a href="#">#9</a>  | 8   |
| 41 |                     |                     |     |
| 42 | pertaining to human |                     |     |
| 43 |                     |                     |     |
| 44 | subjects            |                     |     |
| 45 |                     |                     |     |
| 46 |                     |                     |     |
| 47 |                     |                     |     |
| 48 |                     |                     |     |
| 49 |                     |                     |     |
| 50 | Data collection     | <a href="#">#10</a> | 7-8 |
| 51 |                     |                     |     |
| 52 | methods             |                     |     |
| 53 |                     |                     |     |
| 54 |                     |                     |     |
| 55 |                     |                     |     |
| 56 |                     |                     |     |
| 57 |                     |                     |     |
| 58 |                     |                     |     |
| 59 |                     |                     |     |
| 60 |                     |                     |     |

1 triangulation of sources / methods, and

2 modification of procedures in response to

3 evolving study findings; rationale

|    |                 |                     |                                                        |
|----|-----------------|---------------------|--------------------------------------------------------|
| 4  |                 |                     |                                                        |
| 5  |                 |                     |                                                        |
| 6  |                 |                     |                                                        |
| 7  |                 |                     |                                                        |
| 8  | Data collection | <a href="#">#11</a> | Description of instruments (e.g. interview             |
| 9  |                 |                     | 7, Supplementary                                       |
| 10 | instruments and |                     | guides, questionnaires) and devices (e.g. audio file 1 |
| 11 |                 |                     | recorders) used for data collection; if / how the      |
| 12 | technologies    |                     | instruments(s) changed over the course of the          |
| 13 |                 |                     | study                                                  |
| 14 |                 |                     |                                                        |
| 15 |                 |                     |                                                        |
| 16 |                 |                     |                                                        |
| 17 |                 |                     |                                                        |
| 18 |                 |                     |                                                        |
| 19 |                 |                     |                                                        |
| 20 | Units of study  | <a href="#">#12</a> | Number and relevant characteristics of                 |
| 21 |                 |                     | 8-9,                                                   |
| 22 |                 |                     | participants, documents, or events included in         |
| 23 |                 |                     | Supplementary file                                     |
| 24 |                 |                     | the study; level of participation (could be            |
| 25 |                 |                     | 2                                                      |
| 26 |                 |                     | reported in results)                                   |
| 27 |                 |                     |                                                        |
| 28 |                 |                     |                                                        |
| 29 |                 |                     |                                                        |
| 30 | Data processing | <a href="#">#13</a> | Methods for processing data prior to and               |
| 31 |                 |                     | 7-8                                                    |
| 32 |                 |                     | during analysis, including transcription, data         |
| 33 |                 |                     | entry, data management and security,                   |
| 34 |                 |                     | verification of data integrity, data coding, and       |
| 35 |                 |                     | anonymisation / deidentification of excerpts           |
| 36 |                 |                     |                                                        |
| 37 |                 |                     |                                                        |
| 38 |                 |                     |                                                        |
| 39 |                 |                     |                                                        |
| 40 |                 |                     |                                                        |
| 41 |                 |                     |                                                        |
| 42 | Data analysis   | <a href="#">#14</a> | Process by which inferences, themes, etc.              |
| 43 |                 |                     | 8                                                      |
| 44 |                 |                     | were identified and developed, including the           |
| 45 |                 |                     | researchers involved in data analysis; usually         |
| 46 |                 |                     | references a specific paradigm or approach;            |
| 47 |                 |                     | rationale                                              |
| 48 |                 |                     |                                                        |
| 49 |                 |                     |                                                        |
| 50 |                 |                     |                                                        |
| 51 |                 |                     |                                                        |
| 52 |                 |                     |                                                        |
| 53 |                 |                     |                                                        |
| 54 |                 |                     |                                                        |
| 55 |                 |                     |                                                        |
| 56 |                 |                     |                                                        |
| 57 |                 |                     |                                                        |
| 58 |                 |                     |                                                        |
| 59 |                 |                     |                                                        |
| 60 |                 |                     |                                                        |

|    |                         |                     |                                                   |       |
|----|-------------------------|---------------------|---------------------------------------------------|-------|
| 1  | Techniques to enhance   | <a href="#">#15</a> | Techniques to enhance trustworthiness and         | 8     |
| 2  |                         |                     |                                                   |       |
| 3  | trustworthiness         |                     | credibility of data analysis (e.g. member         |       |
| 4  |                         |                     | checking, audit trail, triangulation); rationale  |       |
| 5  |                         |                     |                                                   |       |
| 6  |                         |                     |                                                   |       |
| 7  |                         |                     |                                                   |       |
| 8  |                         |                     |                                                   |       |
| 9  | <b>Results/findings</b> |                     |                                                   |       |
| 10 |                         |                     |                                                   |       |
| 11 |                         |                     |                                                   |       |
| 12 | Syntheses and           | <a href="#">#16</a> | Main findings (e.g. interpretations, inferences,  | 8-13  |
| 13 |                         |                     |                                                   |       |
| 14 | interpretation          |                     | and themes); might include development of a       |       |
| 15 |                         |                     | theory or model, or integration with prior        |       |
| 16 |                         |                     | research or theory                                |       |
| 17 |                         |                     |                                                   |       |
| 18 |                         |                     |                                                   |       |
| 19 |                         |                     |                                                   |       |
| 20 |                         |                     |                                                   |       |
| 21 |                         |                     |                                                   |       |
| 22 | Links to empirical data | <a href="#">#17</a> | Evidence (e.g. quotes, field notes, text          | 8-13  |
| 23 |                         |                     |                                                   |       |
| 24 |                         |                     | excerpts, photographs) to substantiate analytic   |       |
| 25 |                         |                     | findings                                          |       |
| 26 |                         |                     |                                                   |       |
| 27 |                         |                     |                                                   |       |
| 28 |                         |                     |                                                   |       |
| 29 | <b>Discussion</b>       |                     |                                                   |       |
| 30 |                         |                     |                                                   |       |
| 31 |                         |                     |                                                   |       |
| 32 |                         |                     |                                                   |       |
| 33 | Intergration with prior | <a href="#">#18</a> | Short summary of main findings; explanation of    | 13-14 |
| 34 |                         |                     |                                                   |       |
| 35 | work, implications,     |                     | how findings and conclusions connect to,          |       |
| 36 |                         |                     | support, elaborate on, or challenge conclusions   |       |
| 37 | transferability and     |                     | of earlier scholarship; discussion of scope of    |       |
| 38 |                         |                     | application / generalizability; identification of |       |
| 39 | contribution(s) to the  |                     | unique contributions(s) to scholarship in a       |       |
| 40 |                         |                     | discipline or field                               |       |
| 41 | field                   |                     |                                                   |       |
| 42 |                         |                     |                                                   |       |
| 43 |                         |                     |                                                   |       |
| 44 |                         |                     |                                                   |       |
| 45 |                         |                     |                                                   |       |
| 46 |                         |                     |                                                   |       |
| 47 |                         |                     |                                                   |       |
| 48 |                         |                     |                                                   |       |
| 49 | Limitations             | <a href="#">#19</a> | Trustworthiness and limitations of findings       | 15    |
| 50 |                         |                     |                                                   |       |
| 51 |                         |                     |                                                   |       |
| 52 | <b>Other</b>            |                     |                                                   |       |
| 53 |                         |                     |                                                   |       |
| 54 |                         |                     |                                                   |       |
| 55 |                         |                     |                                                   |       |
| 56 |                         |                     |                                                   |       |
| 57 |                         |                     |                                                   |       |
| 58 |                         |                     |                                                   |       |
| 59 |                         |                     |                                                   |       |
| 60 |                         |                     |                                                   |       |

|    |                       |                     |                                                |                    |
|----|-----------------------|---------------------|------------------------------------------------|--------------------|
| 1  | Conflicts of interest | <a href="#">#20</a> | Potential sources of influence of perceived    | The authors report |
| 2  |                       |                     |                                                |                    |
| 3  |                       |                     |                                                |                    |
| 4  |                       |                     | influence on study conduct and conclusions;    | no conflict of     |
| 5  |                       |                     |                                                |                    |
| 6  |                       |                     | how these were managed                         | interest, page 3   |
| 7  |                       |                     |                                                |                    |
| 8  |                       |                     |                                                |                    |
| 9  | Funding               | <a href="#">#21</a> | Sources of funding and other support; role of  | 3                  |
| 10 |                       |                     |                                                |                    |
| 11 |                       |                     | funders in data collection, interpretation and |                    |
| 12 |                       |                     |                                                |                    |
| 13 |                       |                     | reporting                                      |                    |
| 14 |                       |                     |                                                |                    |
| 15 |                       |                     |                                                |                    |

16 None The SRQR checklist is distributed with permission of Wolters Kluwer © 2014 by the Association  
17 of American Medical Colleges. This checklist can be completed online using  
18  
19 <https://www.goodreports.org/>, a tool made by the [EQUATOR Network](#) in collaboration with  
20  
21 [Penelope.ai](#)  
22  
23  
24  
25  
26  
27  
28  
29  
30  
31  
32  
33  
34  
35  
36  
37  
38  
39  
40  
41  
42  
43  
44  
45  
46  
47  
48  
49  
50  
51  
52  
53  
54  
55  
56  
57  
58  
59  
60
