# Supplementary material for: Semistructured interviews regarding patients’ perceptions of Choosing Wisely and shared decision-making: an Australian study
Source: PubMed Central journal article supplement — BMJ Open. 2019 Aug 28;9(8):e031831. doi: 10.1136/bmjopen-2019-031831 (PMC6720255; doi:10.1136/bmjopen-2019-031831), 2019-08-28
Supplement: bmjopen-2019-031831supp002.pdf [file bmjopen-2019-031831supp002.pdf]

**Supplementary File 2. Demographic Characteristics of Participants (N=22)**

| Demographic information                          | Frequency (%) |
|--------------------------------------------------|---------------|
| <b>Country of birth</b>                          |               |
| Australia/NZ                                     | 13 (59.1)     |
| United Kingdom                                   | 3 (13.6)      |
| Hungary                                          | 2 (9.1)       |
| China                                            | 2 (9.1)       |
| South Africa                                     | 1 (4.5)       |
| Netherlands                                      | 1 (4.5)       |
| <b>Completed secondary school education</b>      |               |
| Year 12                                          | 9 (30.0)      |
| Year 11                                          | 6 (20.0)      |
| Year 10                                          | 4 (13.3)      |
| Less than year 9                                 | 3 (10.0)      |
| <b>Completed post secondary school education</b> |               |
| University degree                                | 6 (27.3)      |
| Vocational Education and Training                | 8 (26.7)      |
| Nil                                              | 8 (26.7)      |
| <b>Occupation</b>                                |               |
| Registered nurse/Enrolled nurse                  | 3 (13.6)      |
| Housekeeper/cook                                 | 3 (13.6)      |
| Teacher                                          | 2 (9.1)       |
| Home duties                                      | 2 (9.1)       |
| Manager/accounting                               | 2 (9.1)       |
| Unemployed                                       | 2 (9.1)       |
| Other                                            | 8 (36.4)      |

---

|                                    |           |
|------------------------------------|-----------|
| Income source                      |           |
| Employed                           | 8 (36.4)  |
| Self-funded retirement             | 3 (13.6)  |
| Unemployment or disability benefit | 3 (13.6)  |
| Old age pension/veterans' pension  | 8 (36.4)  |
| Retired                            |           |
| Yes                                | 11 (50.0) |
| No                                 | 11 (50.0) |

---
